# Supplementary material
Source: PubMed Central journal article supplement (PMC4958235)
Supplement: AAC.01757-15_zac007165313so1.pdf [file AAC.01757-15_zac007165313so1.pdf]

## SUPPLEMENTING INFORMATION

### Quinolone amides as antitrypanosomal lead compounds with *in vivo* activity

Georg Hiltensperger,<sup>a\*</sup> Nina Hecht,<sup>a\*</sup> Marcel Kaiser,<sup>b,c</sup> Jens-Christoph Rybak,<sup>a</sup> Alexander Hoerst,<sup>a\*</sup> Nicole Dannenbauer,<sup>d</sup> Klaus Müller-Buschbaum,<sup>d</sup> Heike Bruhn,<sup>e</sup> Harald Esch,<sup>a</sup> Leane Lehmann,<sup>a</sup> Lorenz Meinel,<sup>a</sup> Ulrike Holzgrabe<sup>a#</sup>

Universität Würzburg, Institut für Pharmazie und Lebensmittelchemie, Am Hubland, 97074 Würzburg, Germany<sup>a</sup>; Swiss Tropical and Public Health Institute, Parasite Chemotherapy, Socinstr. 57, 4002 Basel, Switzerland<sup>b</sup>; Universität Basel, Peterplatz 1, 4003 Basel, Switzerland<sup>c</sup>; Universität Würzburg, Institut für Anorganische Chemie, Am Hubland, 97074 Würzburg, Germany<sup>d</sup>; Universität Würzburg, Institut für Molekulare Infektionsbiologie, Josef-Schneider-Straße 2/Bau D15, 97080 Würzburg, Germany<sup>e</sup>.

#Corresponding author: Prof. Dr. Ulrike Holzgrabe, +49-931-3185461, [ulrike.holzgrabe@pharmazie.uni-wuerzburg.de](mailto:ulrike.holzgrabe@pharmazie.uni-wuerzburg.de)

\*Present address: Georg Hiltensperger, 4SC AG, Am Klopferspitz 19a, 82152 Planegg-Martinsried, Germany; Nina Hecht, ACC GmbH, Schöntalweg 9, 63849 Leidersbach, Germany; Alexander Hörst, Universitätskrankenhaus Würzburg, Apotheke, Josef-Schneider-Straße 2, 97080 Würzburg, Germany.

#### Content:

1. Syntheses
2. Physicochemical characterization
3. *In vitro* activity and Cytotoxicity
4. PBPK modelling
5. Pharmacokinetics

## Syntheses

The compounds A, B, C, D, GHQ168, H, I, J, P, Q, R have already been published and can be found in refs 1, 2, 3, 4, 5, 6, 7, and 8.

### Synthesis of *N*-Benzyl-1-butyl-6-fluoro-7-morpholino-4-oxo-1,4-dihydroquinoline-3-carboxamide (GHQ168)

#### Synthesis of Diethyl 2-(((3-chloro-4-fluorophenyl)amino)methylene)malonate (A) (1)

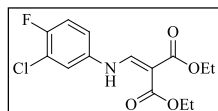

A solution of 5.00 g (34.4 mmol) 3-chloro-4-fluoroaniline, 8.91 g (41.2 mmol, 8.33 ml) diethyl ethoxymethylenemalonate and 5 Weflon<sup>®</sup>-discs were heated to 110 °C under microwave irradiation (heat-up rate: in 3 min to 110 °C, 800 W). After 1 h at 110 °C the solvent was removed under reduced pressure and the remaining oil was dissolved in 50 ml *n*-hexane. After storing the solution at -20 °C overnight the white precipitate was filtered off, washed with cold *n*-hexane and dried in vacuo.

Yield: 10.8 g (34.2 mmol, 99 %), mp: 60 - 62 °C (*n*-hexane).

Spectroscopical data were consistent with literature [1].

#### Synthesis of Ethyl 7-chloro-6-fluoro-4-hydroxyquinoline-3-carboxylate (B) (1)

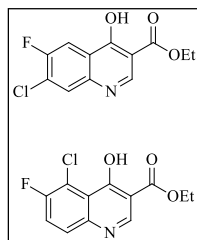

10.0 g (31.7 mmol) of diethyl 2-(((3-chloro-4-fluorophenyl)amino)methylene)malonate (A) were dissolved in 5 ml Ph<sub>2</sub>O. After addition of 3 Weflon<sup>®</sup>-discs the mixture was heated to 210 °C for 15 min under microwave irradiation (heat-up rate: in 5 min to 210 °C, 800 W). The resulting suspension was cooled to rt, diluted with 100 ml Et<sub>2</sub>O and stirred for 1 h. The light grey solid was filtered off, washed with Et<sub>2</sub>O and dried in vacuo to give the desired regioisomer in a 10:1 ratio.

Yield: 5.26 g (19.5 mmol, 62 %), mp: 315 - 318 °C (Ph<sub>2</sub>O).

Spectroscopical data were consistent with literature (1).

### Synthesis of 1-Butyl-7-chloro-6-fluoro-4-oxo-1,4-dihydroquinoline-3-carboxylic acid (C) (2)

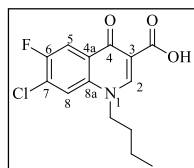

1.00 g (3.71 mmol) ethyl 7-chloro-6-fluoro-4-hydroxyquinoline-3-carboxylate (B) and 2.56 g (18.5 mmol)  $K_2CO_3$  were suspended in 20 ml anhydrous DMF and heated to 60 °C for 1 h. 3.05 g (22.3 mmol, 2.38 ml) 1-bromobutane and a catalytic amount of KI were added and the mixture was stirred at 100 °C for 24 h. The solvent was removed in vacuo and the residue was partitioned between 60 ml water and 50 ml EA. After separation the aqueous layer was extracted with EA (3 x 50 ml). The combined organic layers were dried over  $Na_2SO_4$ , concentrated in vacuo and the crude ester was purified by normal phase column chromatography on silica gel ( $CHCl_3/iPrOH$  150:1,  $R_f$ : 0.33). The resulting white solid was suspended in 45 ml of aqueous KOH-solution (3 M) and 5 ml EtOH and refluxed for 20 h. After cooling to rt the clear solution was acidified (pH = 3 - 4) with aqueous HCl-solution (2 M). The white precipitate was filtered off and recrystallized from EtOH.

Yield: 960 mg (3.23 mmol, 87 %), mp: 233 - 235 (EtOH).

Spectroscopical data were consistent with literature (2).

### Synthesis of 1-Butyl-6-fluoro-7-morpholino-4-oxo-1,4-dihydroquinoline-3-carboxylic acid (D) (2)

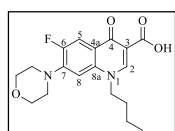

200 mg (672  $\mu$ mol) 1-butyl-7-chloro-6-fluoro-4-oxo-1,4-dihydroquinoline-3-carboxylic acid (C) were dissolved in 10 ml morpholine and heated to 110 °C for 4 h under microwave irradiation (heat-up rate: in 4 min to 110 °C, 600 W). The mixture was diluted with 30 ml water and acidified (pH = 5) with aqueous HCl-solution (2 M). The precipitate was collected by filtration and recrystallized from EtOH/ $CHCl_3$  to give a light yellow solid.

Yield: 160 mg (459  $\mu$ mol, 68 %), mp: 242 - 243 °C (EtOH/ $CHCl_3$ ).

Spectroscopical data were consistent with literature [2].

### Synthesis of N-Benzyl-1-butyl-6-fluoro-7-morpholino-4-oxo-1,4-dihydroquinoline-3-carboxamide (GHQ168) (2)

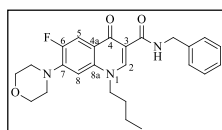

To a cooled solution (0 °C) of 150 mg (431  $\mu$ mol) 1-butyl-6-fluoro-7-morpholino-4-oxo-1,4-dihydroquinoline-3-carboxylic acid (D) and 218 mg (2.15 mmol, 237  $\mu$ l) NMM in 10 ml anhydrous DMF 235 mg (1.72 mmol, 223  $\mu$ l) isobutyl chloroformate were added dropwise under argon atmosphere. After 1 h at 0 °C

185 mg (2.90 mmol, 188  $\mu$ l) benzylamine were added and stirring at rt was continued for 45 min. The solvent was removed in vacuo and the crude product was purified via normal phase column chromatography on silica gel ( $\text{CHCl}_3/\text{MeOH}$  100:1,  $R_f$ : 0.79) followed by recrystallization from EA.

Yield: 135 mg (309  $\mu$ mol, 72 %), mp: 157 - 159 (EA).

Spectroscopical data were consistent with literature (2).

### Synthesis of *N*-Benzyl-1-butyl-6-fluoro-7-morpholino-4-oxo-1,4-dihydroquinoline-3-carboximidamide hydrochloride (GHQ232)

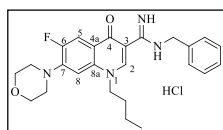

200 mg (457  $\mu$ mol) *N*-Benzyl-1-butyl-6-fluoro-7-morpholino-4-oxo-1,4-dihydroquinoline-3-carboxamide (GHQ168) were dissolved in 4 ml  $\text{POCl}_3$  and warmed to 40  $^\circ\text{C}$  for 24 h. The solution was diluted with 20 ml toluene and concentrated to dryness in vacuo. The residue was dissolved in 10 ml anhydrous ACN under argon atmosphere and cooled to 0  $^\circ\text{C}$ . A separately prepared solution of 49 mg (914  $\mu$ mol)  $\text{NH}_4\text{Cl}$  and 118 mg (914  $\mu$ mol, 159  $\mu$ l) DIPEA dissolved in 5 ml anhydrous ACN, which was stirred at rt for 30 min under argon atmosphere, was added dropwise and the combined mixture was stirred at 0  $^\circ\text{C}$  for 3 h. After dilution with 20 ml water the pH value was adjusted to 8 - 9 using conc.  $\text{NH}_3$ -solution and the aqueous mixture was extracted with DCM (4 x 30 ml). The combined organic layers were dried over  $\text{Na}_2\text{SO}_4$  and concentrated in vacuo. The crude product was purified by means of normal phase column chromatography on silica gel ( $\text{CHCl}_3/\text{MeOH}/\text{conc. NH}_3$  100:10:1,  $R_f$ : 0.31). The obtained solid was dissolved in 10 ml THF and treated with 1 ml of isopropanolic HCl-solution in order to achieve the corresponding hydrochloride salt. The resulting precipitate was filtered off and recrystallized from ACN/MeOH to give the desired product as a light yellow solid.

Yield: 56 mg (118  $\mu$ mol, 26 %), mp: 311 - 312  $^\circ\text{C}$  (ACN/MeOH),

**IR** (ATR,  $\tilde{\nu}$  [ $\text{cm}^{-1}$ ]): 3223 (w), 3113 (w), 3060 (w), 2965 (w), 2872 (w), 1644 (s), 1626 (m), 1557 (m), 1509 (s), 1449 (m), 1370 (m), 1255 (s), 1118 (m), 929 (m), 823 (m), 737 (w), 694 (m).

**$^1\text{H-NMR}$**  ( $\text{DMSO-}d_6$ ,  $\delta$  [ppm],  $J$  [Hz]): 9.93 (s, 1H,  $\text{CNH}_2\text{NHR}^+$ ), 9.67 (t, 1H,  $^3J = 5.6$ ,  $\text{CNH}_2\text{NHR}^+$ ), 9.47 (s, 1H,  $\text{CNH}_2\text{NHR}^+$ ), 9.34 (s, 1H, **H-2**), 8.56 (d, 1H,  $^3J_{\text{H,F}} = 15.0$ , **H-5**), 7.42-7.25 (m, 5H, benzyl- $\text{CH}_{\text{arom}}$ ), 7.20 (d, 1H,  $^4J_{\text{H,F}} = 7.7$ , **H-8**), 4.59 (t, 2H,  $^3J = 7.4$ ,  $\text{NCH}_2\text{CH}_2\text{CH}_2\text{CH}_3$ ), 4.51 (d, 2H,  $^3J = 5.6$ , benzyl- $\text{CH}_2$ ), 3.82-3.80 (m, 4H, morpholino- $\text{CH}_2\text{-O-CH}_2$ ), 3.41-3.38 (m, 4H, morpholino- $\text{CH}_2\text{-N-CH}_2$ ), 1.86 (quint, 2H,  $^3J = 7.4$ ,

NCH<sub>2</sub>CH<sub>2</sub>CH<sub>2</sub>CH<sub>3</sub>), 1.41 (sext, 2H, <sup>3</sup>J = 7.4, NCH<sub>2</sub>CH<sub>2</sub>CH<sub>2</sub>CH<sub>3</sub>), 0.95 (t, 3H, <sup>3</sup>J = 7.4, NCH<sub>2</sub>CH<sub>2</sub>CH<sub>2</sub>CH<sub>3</sub>).

<sup>13</sup>C-NMR (DMSO-*d*<sub>6</sub>, δ [ppm], *J* [Hz]): 165.3 (1C, CNH<sub>2</sub>NHR<sup>+</sup>), 155.7 (d, 1C, <sup>4</sup>J<sub>C,F</sub> = 2.7, C-4), 152.8 (d, 1C, <sup>1</sup>J<sub>C,F</sub> = 251.7, C-6), 146.4 (1C, C-2), 145.6 (d, 1C, <sup>2</sup>J<sub>C,F</sub> = 10.0, C-7), 138.8 (1C, benzyl-C<sub>q</sub>), 135.7 (1C, C-8a), 128.3 (2C, benzyl-CH<sub>arom.</sub>), 127.5 (2C, benzyl-CH<sub>arom.</sub>), 126.9 (1C, benzyl-CH<sub>arom.</sub>), 111.6 (d, 1C, <sup>3</sup>J<sub>C,F</sub> = 9.6, C-4a), 111.4 (d, 1C, <sup>2</sup>J<sub>C,F</sub> = 25.4, C-5), 105.0 (d, 1C, <sup>3</sup>J<sub>C,F</sub> = 4.6, C-8), 103.0 (1C, C-3), 65.7 (2C, morpholino-CH<sub>2</sub>-O-CH<sub>2</sub>), 54.2 (1C, NCH<sub>2</sub>CH<sub>2</sub>CH<sub>2</sub>CH<sub>3</sub>), 49.5 (2C, <sup>4</sup>J<sub>C,F</sub> = 4.6, morpholino-CH<sub>2</sub>-N-CH<sub>2</sub>), 42.5 (1C, benzyl-CH<sub>2</sub>), 30.1 (1C, NCH<sub>2</sub>CH<sub>2</sub>CH<sub>2</sub>CH<sub>3</sub>), 19.1 (1C, NCH<sub>2</sub>CH<sub>2</sub>CH<sub>2</sub>CH<sub>3</sub>), 13.4 (1C, NCH<sub>2</sub>CH<sub>2</sub>CH<sub>2</sub>CH<sub>3</sub>).

### Synthesis of Sodium 3-(benzylcarbamoyl)-1-butyl-6-fluoro-7-morpholino-2-oxo-1,2-dihydroquinoline-4-olate (GHQ215)

#### Synthesis of 2-(Butylamino)-4-chloro-5-fluorobenzoic acid (E)

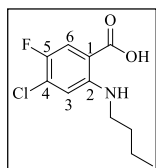

2.00 g (9.57 mmol) 2,4-Dichloro-5-fluorobenzoic acid, 1.32 g (9.57 mmol) K<sub>2</sub>CO<sub>3</sub> and 608 mg (9.57 mmol) copper powder were suspended in 20 ml anhydrous DMF under argon atmosphere and stirred at rt for 10 min. After addition of 1.40 g (19.1 mmol, 1.89 ml) *n*-butylamine the mixture was heated to 80 °C for 5 h. The solvent

was removed in vacuo and the residue was dissolved in 50 ml water. After the pH value was adjusted to 4 using aqueous HCL-solution (2 M) the suspension was extracted with DCM (4 x 50 ml). The combined organic layers were dried over Na<sub>2</sub>SO<sub>4</sub> and concentrated under reduced pressure. The crude product was purified by normal phase column chromatography on silica gel (CHCl<sub>3</sub>/FA 100:1, R<sub>f</sub>: 0.65) to give the desired product as light yellow solid.

Yield: 1.74 g (7.08 mmol, 74 %), mp: 138 - 139 °C (CHCl<sub>3</sub>/FA).

**IR** (ATR),  $\tilde{\nu}$  [cm<sup>-1</sup>]: 3380 (m), 2954 (m), 2929 (w), 2869 (m), 1660 (s), 1570 (s), 1510 (s), 1478 (m), 1406 (m), 1223 (s), 1191 (s), 997 (m), 840 (m).

<sup>1</sup>H-NMR (DMSO-*d*<sub>6</sub>, δ [ppm], *J* [Hz]): 11.7 (s, 1H, COOH), 7.74 (d, 1H, <sup>3</sup>J<sub>H,F</sub> = 9.9, H-6), 7.45 (s, 1H, NH), 6.71 (d, 1H, <sup>4</sup>J<sub>H,F</sub> = 6.1, H-3), 3.18 (t, 2H, <sup>3</sup>J = 7.3, NCH<sub>2</sub>CH<sub>2</sub>CH<sub>2</sub>CH<sub>3</sub>), 1.71 (quint, 2H, <sup>3</sup>J = 7.3, NCH<sub>2</sub>CH<sub>2</sub>CH<sub>2</sub>CH<sub>3</sub>), 1.49 (sext, 2H, <sup>3</sup>J = 7.3, NCH<sub>2</sub>CH<sub>2</sub>CH<sub>2</sub>CH<sub>3</sub>), 1.02 (t, 3H, <sup>3</sup>J = 7.3, NCH<sub>2</sub>CH<sub>2</sub>CH<sub>2</sub>CH<sub>3</sub>).

<sup>13</sup>C-NMR (DMSO-*d*<sub>6</sub>, δ [ppm], *J* [Hz]): 172.6 (d, 1C, <sup>4</sup>J<sub>C,F</sub> = 2.2, COOH), 148.9 (1C, C-2), 148.1 (d, 1C, <sup>1</sup>J<sub>C,F</sub> = 236.3, C-5), 129.6 (d, 1C, <sup>2</sup>J<sub>C,F</sub> = 18.9, C-4), 118.6 (d, 1C, <sup>2</sup>J<sub>C,F</sub> = 22.8, C-

6), 112.7 (1C, C-3), 106.8 (d, 1C,  $^3J_{C,F} = 5.3$ , C-1), 43.0 (1C, NCH<sub>2</sub>CH<sub>2</sub>CH<sub>2</sub>CH<sub>3</sub>), 31.0 (1C, NCH<sub>2</sub>CH<sub>2</sub>CH<sub>2</sub>CH<sub>3</sub>), 20.3 (1C, NCH<sub>2</sub>CH<sub>2</sub>CH<sub>2</sub>CH<sub>3</sub>), 13.8 (1C, NCH<sub>2</sub>CH<sub>2</sub>CH<sub>2</sub>CH<sub>3</sub>).

Synthesis of Ethyl 1-butyl-7-chloro-6-fluoro-4-hydroxy-2-oxo-1,2-dihydroquinoline-3-carboxylate (F)

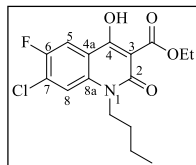

To a cooled solution (0 °C) of 628 mg (2.12 mmol) triphosgene in 10 ml anhydrous CHCl<sub>3</sub>, 400 mg (1.63 mmol) 2-(butylamino)-4-chlor-5-fluorobenzoic acid (E) dissolved in 5 ml anhydrous CHCl<sub>3</sub> were added dropwise under argon atmosphere. After 20 h of stirring at rt 5 ml sat. NaHCO<sub>3</sub>-solution were added carefully and the biphasic system was stirred at rt for further 5 min. The organic layer was separated and the aqueous layer was extracted with CHCl<sub>3</sub> (2 x 30 ml). The combined organic layers were dried over Na<sub>2</sub>SO<sub>4</sub> and concentrated in vacuo to give the crude isatoic anhydrid derivative. Under argon atmosphere 98 mg (2.45 mmol) sodium hydride (60 % dispersion in mineral oil) were suspended in 15 ml anhydrous DMF followed by addition of 522 mg (3.26 mmol, 493 μl) diethyl malonate. After stirring for 15 min at rt the mixture was cooled to 0 °C and the crude isatoic anhydride dissolved in 5 ml anhydrous DMF was added dropwise. After complete addition the solution was stirred at rt for 16 h followed by evaporation under reduced pressure. The residue was dissolved in 20 ml water, the pH value was adjusted to 4 using aqueous HCl-solution (2 M) and the resulting precipitate was collected via filtration. The crude product was purified via normal phase column chromatography on silica gel (CHCl<sub>3</sub>, R<sub>f</sub>: 0.94) to give a white solid.

Yield: 310 mg (907 μmol, 56 %), mp: 119 - 120 °C (CHCl<sub>3</sub>).

**IR** (ATR),  $\tilde{\nu}$  [cm<sup>-1</sup>]: 3079 (w), 2965 (m), 2934 (m), 2874 (w), 1666 (s), 1629 (s), 1593 (m), 1555 (m), 1500 (s), 1467 (m), 1410 (m), 1318 (s), 1207 (s), 1042 (m), 898 (m), 807 (m).

**<sup>1</sup>H-NMR** (CDCl<sub>3</sub>, δ [ppm], *J* [Hz]): 14.2 (s, 1H, OH), 7.90 (d, 1H,  $^3J_{H,F} = 8.9$ , H-5), 7.31 (d, 1H,  $^4J_{H,F} = 5.9$ , H-8), 4.50 (q, 2H,  $^3J = 7.1$ , OCH<sub>2</sub>CH<sub>3</sub>), 4.14 (t, 2H,  $^3J = 7.5$ , NCH<sub>2</sub>CH<sub>2</sub>CH<sub>2</sub>CH<sub>3</sub>), 1.67 (quint, 2H,  $^3J = 7.5$ , NCH<sub>2</sub>CH<sub>2</sub>CH<sub>2</sub>CH<sub>3</sub>), 1.49 (sext, 2H,  $^3J = 7.5$ , NCH<sub>2</sub>CH<sub>2</sub>CH<sub>2</sub>CH<sub>3</sub>), 1.47 (t, 3H,  $^3J = 7.1$ , OCH<sub>2</sub>CH<sub>3</sub>), 1.00 (t, 3H,  $^3J = 7.5$ , NCH<sub>2</sub>CH<sub>2</sub>CH<sub>2</sub>CH<sub>3</sub>).

**<sup>13</sup>C-NMR** (CDCl<sub>3</sub>, δ [ppm], *J* [Hz]): 172.9 (1C, CO<sub>2</sub>Et), 170.6 (d, 1C,  $^4J_{C,F} = 2.8$ , C-4), 159.2 (1C, C-2), 153.5 (d, 1C,  $^1J_{C,F} = 245.8$ , C-6), 137.9 (d, 1C,  $^4J_{C,F} = 1.8$ , C-8a), 128.9 (d, 1C,  $^2J_{C,F} = 19.6$ , C-7), 116.6 (1C, C-8), 114.9 (d, 1C,  $^3J_{C,F} = 7.3$ , C-4a), 112.6 (d, 1C,  $^2J_{C,F} = 23.6$ , C-5), 99.1 (1C, C-3), 63.1 (1C, OCH<sub>2</sub>CH<sub>3</sub>), 43.1 (1C, NCH<sub>2</sub>CH<sub>2</sub>CH<sub>2</sub>CH<sub>3</sub>), 29.9 (1C,

NCH<sub>2</sub>CH<sub>2</sub>CH<sub>2</sub>CH<sub>3</sub>), 20.7 (1C, NCH<sub>2</sub>CH<sub>2</sub>CH<sub>2</sub>CH<sub>3</sub>), 14.7 (1C, OCH<sub>2</sub>CH<sub>3</sub>), 14.2 (1C, NCH<sub>2</sub>CH<sub>2</sub>CH<sub>2</sub>CH<sub>3</sub>).

Synthesis of N-Benzyl-1-butyl-7-chloro-6-fluoro-4-hydroxy-2-oxo-1,2-dihydroquinoline-3-carboxamide (G)

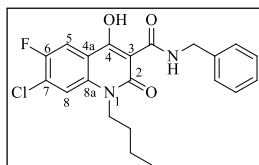

To a solution of 280 mg (819  $\mu$ mol) ethyl 1-butyl-7-chloro-6-fluoro-4-hydroxy-2-oxo-1,2-dihydroquinoline-3-carboxylate (F) in 100 ml toluene 220 mg (2.05 mmol, 223  $\mu$ l) benzylamine were added and the mixture was refluxed for 1 h. Within that time 3 x 10 ml toluene were distilled off (Dean-Stark-apparatus) and replaced by an equal amount of fresh toluene. Afterwards the solvent was concentrated to a volume of about 5 ml. Upon cooling to rt the desired product crystallized as white solid which was dried in vacuo.

Yield: 264 mg (655  $\mu$ mol, 80 %), mp: 111 - 112 °C (toluene).

**IR** (ATR),  $\tilde{\nu}$  [cm<sup>-1</sup>]: 3210 (w), 2957 (m), 2925 (w), 2867 (w), 1638 (s), 1585 (m), 1542 (s), 1498 (s), 1457 (m), 1397 (m), 1335 (m), 1218 (m), 1031 (m), 885 (m), 801 (m), 693 (m).

**<sup>1</sup>H-NMR** (DMSO-*d*<sub>6</sub>,  $\delta$  [ppm], *J* [Hz]): 10.6 (t, 1H, <sup>3</sup>*J* = 6.0, CONHR), 7.87 (d, 1H, <sup>4</sup>*J*<sub>H,F</sub> = 4.8, H-8), 7.85 (d, 1H, <sup>3</sup>*J*<sub>H,F</sub> = 8.2, H-5), 7.37-7.26 (m, 5H, benzyl-CH<sub>arom.</sub>), 4.58 (d, 2H, <sup>3</sup>*J* = 6.0, benzyl-CH<sub>2</sub>), 4.17 (t, 2H, <sup>3</sup>*J* = 7.3, NCH<sub>2</sub>CH<sub>2</sub>CH<sub>2</sub>CH<sub>3</sub>), 1.54 (quint, 2H, <sup>3</sup>*J* = 7.3, NCH<sub>2</sub>CH<sub>2</sub>CH<sub>2</sub>CH<sub>3</sub>), 1.37 (sext, 2H, <sup>3</sup>*J* = 7.3, NCH<sub>2</sub>CH<sub>2</sub>CH<sub>2</sub>CH<sub>3</sub>), 0.91 (t, 3H, <sup>3</sup>*J* = 7.3, NCH<sub>2</sub>CH<sub>2</sub>CH<sub>2</sub>CH<sub>3</sub>).

**<sup>13</sup>C-NMR** (DMSO-*d*<sub>6</sub>,  $\delta$  [ppm], *J* [Hz]): 170.1 (1C, CONHR), 169.8 (d, 1C, <sup>4</sup>*J*<sub>C,F</sub> = 2.5, C-4), 161.0 (1C, C-2), 152.3 (d, 1C, <sup>1</sup>*J*<sub>C,F</sub> = 244.8, C-6), 137.8 (1C, benzyl-C<sub>q</sub>), 135.9 (d, 1C, <sup>4</sup>*J*<sub>C,F</sub> = 1.3, C-8a), 128.5 (2C, benzyl-CH<sub>arom.</sub>), 127.5 (2C, benzyl-CH<sub>arom.</sub>), 127.2 (1C, benzyl-CH<sub>arom.</sub>), 126.6 (d, 1C, <sup>2</sup>*J*<sub>C,F</sub> = 19.8, C-7), 117.4 (1C, C-8), 115.0 (d, 1C, <sup>3</sup>*J*<sub>C,F</sub> = 6.8, C-4a), 110.9 (d, 1C, <sup>2</sup>*J*<sub>C,F</sub> = 22.7, C-5), 96.4 (1C, C-3), 42.3 (1C, benzyl-CH<sub>2</sub>), 41.7 (1C, NCH<sub>2</sub>CH<sub>2</sub>CH<sub>2</sub>CH<sub>3</sub>), 29.2 (1C, NCH<sub>2</sub>CH<sub>2</sub>CH<sub>2</sub>CH<sub>3</sub>), 19.4 (1C, NCH<sub>2</sub>CH<sub>2</sub>CH<sub>2</sub>CH<sub>3</sub>), 13.6 (1C, NCH<sub>2</sub>CH<sub>2</sub>CH<sub>2</sub>CH<sub>3</sub>).

Synthesis of Sodium 3-(benzylcarbamoyl)-1-butyl-6-fluoro-7-morpholino-2-oxo-1,2-dihydroquinoline-4-olate (GHQ215)

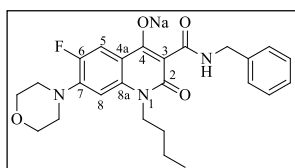

420 mg (1.04 mmol) N-benzyl-1-butyl-7-chloro-6-fluoro-4-hydroxy-2-oxo-1,2-dihydroquinoline-3-carboxamide (G) were dissolved in 15 ml

morpholine and heated to 110 °C for 4 h under microwave irradiation (heat-up rate: in 3 min to 110 °C, 600 W). The solution was diluted with 50 ml water and the pH value was adjusted to 6 using aqueous HCl-solution (2 M). The aqueous solution was extracted with EA (4 x 50 ml), the combined organic layers were dried over Na<sub>2</sub>SO<sub>4</sub> and the solvent was evaporated under reduced pressure followed by purified via normal phase column chromatography on silica gel (PE/EA 3:1, R<sub>f</sub>: 0.57). In order to achieve the corresponding sodium salt the isolated white solid was suspended in 10 ml EtOH and treated with 114 µl (1.14 mmol) aqueous NaOH-solution (10 M). After temporary dissolution the desired sodium salt started to precipitate. After 15 min of stirring at rt the precipitate was filtered off, washed with a mixture of water and EtOH (1:1) and dried in vacuo to give a white solid.

Yield: 112 mg (236 µmol, 23 %), mp: 317 - 318 °C (water).

**IR** (ATR),  $\tilde{\nu}$  [cm<sup>-1</sup>]: 2956 (w), 2852 (w), 1617 (s), 1573 (m), 1496 (s), 1455 (m), 1406 (m), 1259 (m), 1122 (m), 909 (m), 807 (m), 697 (s).

**<sup>1</sup>H-NMR** (DMSO,  $\delta$  [ppm],  $J$  [Hz]): 11.5 (t, 1H, <sup>3</sup> $J$  = 5.4, CONHR), 7.68 (d, 1H, <sup>3</sup> $J_{\text{H,F}}$  = 13.9, H-5), 7.32-7.21 (m, 5H, benzyl-CH<sub>arom.</sub>), 6.64 (d, 1H, <sup>4</sup> $J_{\text{H,F}}$  = 7.0, H-8), 4.46 (d, 2H, <sup>3</sup> $J$  = 5.4, benzyl-CH<sub>2</sub>), 4.10 (br, 2H, NCH<sub>2</sub>CH<sub>2</sub>CH<sub>2</sub>CH<sub>3</sub>), 3.77 (br, 4H, morpholino-CH<sub>2</sub>-O-CH<sub>2</sub>), 3.12 (br, 4H, morpholino-CH<sub>2</sub>-N-CH<sub>2</sub>), 1.56 (quint, 2H, <sup>3</sup> $J$  = 7.2, NCH<sub>2</sub>CH<sub>2</sub>CH<sub>2</sub>CH<sub>3</sub>), 1.37 (sext, 2H, <sup>3</sup> $J$  = 7.2, NCH<sub>2</sub>CH<sub>2</sub>CH<sub>2</sub>CH<sub>3</sub>), 0.95 (t, 3H, <sup>3</sup> $J$  = 7.2, NCH<sub>2</sub>CH<sub>2</sub>CH<sub>2</sub>CH<sub>3</sub>).

**<sup>13</sup>C-NMR** (DMSO,  $\delta$  [ppm],  $J$  [Hz]): 173.7 (d, 1C, <sup>4</sup> $J_{\text{C,F}}$  = 1.5, C-4), 169.1 (1C, CONHR), 164.0 (1C, C-2), 149.6 (d, 1C, <sup>1</sup> $J_{\text{C,F}}$  = 239.9, C-6), 141.9 (d, 1C, <sup>2</sup> $J_{\text{C,F}}$  = 9.6, C-7), 140.8 (1C, benzyl-C<sub>q</sub>), 136.0 (1C, C-8a), 128.1 (2C, benzyl-CH<sub>arom.</sub>), 127.2 (2C, benzyl-CH<sub>arom.</sub>), 126.3 (1C, benzyl-CH<sub>arom.</sub>), 117.4 (d, 1C, <sup>3</sup> $J_{\text{C,F}}$  = 7.2, C-4a), 111.9 (d, 1C, <sup>2</sup> $J_{\text{C,F}}$  = 20.5, C-5), 102.8 (1C, C-8), 97.7 (1C, C-3), 66.0 (2C, morpholino-CH<sub>2</sub>-O-CH<sub>2</sub>), 50.1 (2C, <sup>4</sup> $J_{\text{C,F}}$  = 3.5, morpholino-CH<sub>2</sub>-N-CH<sub>2</sub>), 41.6 (1C, benzyl-CH<sub>2</sub>), 40.2 (1C, NCH<sub>2</sub>CH<sub>2</sub>CH<sub>2</sub>CH<sub>3</sub>), 22.3 (1C, NCH<sub>2</sub>CH<sub>2</sub>CH<sub>2</sub>CH<sub>3</sub>), 19.7 (1C, NCH<sub>2</sub>CH<sub>2</sub>CH<sub>2</sub>CH<sub>3</sub>), 13.7 (1C, NCH<sub>2</sub>CH<sub>2</sub>CH<sub>2</sub>CH<sub>3</sub>).

### **Synthesis of N-Benzyl-1-butyl-7-morpholino-4-oxo-1,4-dihydro-1,6-naphthyridine-3-carboxamide oxalate (GHQ237)**

#### *Synthesis of Ethyl 4,6-dihydroxynicotinate (H) (3)*

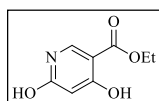

7.00 g (34.6 mmol) Diethyl 1,3-acetonedicarboxylate and 5.13 g (34.6 mmol,



5.70 ml) triethyl orthoformate were dissolved in 7.07 g (69.2 mmol, 6.55 ml) acetic anhydride and heated to reflux for 3 h. Excess of acetic anhydride was removed in vacuo and the residue was dissolved in 15 ml conc. NH<sub>3</sub>-solution. The mixture was stirred at rt for 15 h followed by acidification (pH = 2) with aqueous HCl-solution (2 M). The yellow precipitate was filtered off, washed with water and dried in vacuo.

Yield: 4.68 g (26.5 mmol, 77 %), mp: 214 - 215 °C (water).

Spectroscopical data were consistent with literature (3).

#### Synthesis of Ethyl 4,6-dichloronicotinate (I) (4)

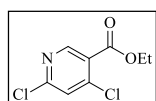

2.50 g (13.7 mmol) ethyl 4,6-dihydroxynicotinate (H) were dissolved in 21.0 g (0.14 mol, 12.6 ml) POCl<sub>3</sub> and heated to 80 °C for 24 h. After cooling to rt the dark brown solution was poured into 150 g ice and the aqueous mixture was extracted with EA (4 x 40 ml). The combined organic layers were washed with 50 ml Na<sub>2</sub>CO<sub>3</sub>-solution (10 %) and 50 ml brine. After drying over Na<sub>2</sub>SO<sub>4</sub> the solvent was evaporated under reduced pressure and the crude product was purified via normal phase column chromatography on silica gel (CHCl<sub>3</sub>/PE 2:1) to give a light yellow oil.

Yield: 2.14 g (9.73 mmol, 71 %).

Spectroscopical data were consistent with literature (4).

#### Synthesis of 4,6-dichloronicotinic acid (J) (5)

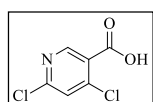

A solution of 441 mg (10.5 mmol) LiOH dissolved in 15 ml water was added dropwise to 1.93 g (8.77 mmol) ethyl 4,6-dichloronicotinate (I) dissolved in 15 ml THF. The mixture was stirred at rt for 15 h followed by evaporation of THF under reduced pressure. The remaining aqueous solution was acidified (pH = 3) using aqueous HCl-solution (2 M) and the resulting precipitate was collected by filtration. The solid was washed with water and dried in vacuo to give the desired product as a white solid.

Yield: 1.28 g (6.67 mmol, 76 %), mp: 151 - 152 (water).

Spectroscopical data were consistent with literature (5).

#### Synthesis of Ethyl 1-butyl-7-chloro-4-oxo-1,4-dihydro-1,6-naphthyridine-3-carboxylate (K)

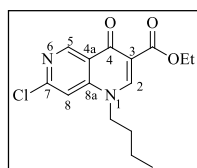

900 mg (4.69 mmol) 4,6-dichloronicotinic acid (J) were dissolved in 15 ml SOCl<sub>2</sub> and heated to 80 °C for 2 h. Afterwards excess of SOCl<sub>2</sub> was distilled off

under reduced pressure and the residue was dissolved in 10 ml anhydrous toluene under argon atmosphere. 1.21 g (9.38 mmol, 1.63 ml) DIPEA and 1.01 g (7.03 mmol) Ethyl 3-(*N,N*-dimethylamino)acrylate were added and the mixture was heated to 90 °C for 2 h. After removing the solvent in vacuo the acrylate intermediate was purified by normal phase column chromatography on silica gel (EA/PE 2:1). The intermediate was dissolved in 40 ml EtOH and 20 ml Et<sub>2</sub>O and 398 mg (5.45 mmol, 538 μl) *n*-butylamine were added. After 10 min of stirring at rt the mixture was evaporated to dryness under reduced pressure. The crude mixture was dissolved in 10 ml anhydrous DMF under argon atmosphere, 1.00 g (7.26 mmol) K<sub>2</sub>CO<sub>3</sub> were added and the suspension was heated to 100 °C for 1 h. The solvent was removed in vacuo and the residue was partitioned between 50 ml water and 40 ml DCM. The organic layer was separated and the aqueous layer was extracted with DCM (3 x 40 ml). The combined organic layers were dried over Na<sub>2</sub>SO<sub>4</sub>, concentrated under reduced pressure and the resulting light brown solid was recrystallized from EA to give the desired product as a light yellow solid.

Yield: 862 mg (2.79 mmol, 77 %), mp: 161 - 162 °C (EA).

**IR** (ATR),  $\tilde{\nu}$  [cm<sup>-1</sup>]: 3071 (w), 2956 (w), 2933 (m), 2872 (w), 1724 (s), 1634 (m), 1577 (s), 1466 (s), 1318 (m), 1225 (m), 1190 (s), 1072 (s), 928 (m), 890 (m), 808 (m).

**<sup>1</sup>H-NMR** (CDCl<sub>3</sub>,  $\delta$  [ppm],  $J$  [Hz]): 9.36 (s, 1H, **H-2**), 8.40 (s, 1H, **H-5**), 7.27 (s, 1H, **H-8**), 4.37 (q, 2H, <sup>3</sup> $J$  = 7.1, OCH<sub>2</sub>CH<sub>3</sub>), 4.09 (t, 2H, <sup>3</sup> $J$  = 7.4, NCH<sub>2</sub>CH<sub>2</sub>CH<sub>2</sub>CH<sub>3</sub>), 1.85 (quint, 2H, <sup>3</sup> $J$  = 7.4, NCH<sub>2</sub>CH<sub>2</sub>CH<sub>2</sub>CH<sub>3</sub>), 1.44 (sext, 2H, <sup>3</sup> $J$  = 7.4, NCH<sub>2</sub>CH<sub>2</sub>CH<sub>2</sub>CH<sub>3</sub>), 1.39 (t, 3H, <sup>3</sup> $J$  = 7.1, OCH<sub>2</sub>CH<sub>3</sub>), 1.01 (t, 3H, <sup>3</sup> $J$  = 7.4, NCH<sub>2</sub>CH<sub>2</sub>CH<sub>2</sub>CH<sub>3</sub>).

**<sup>13</sup>C-NMR** (CDCl<sub>3</sub>,  $\delta$  [ppm],  $J$  [Hz]): 173.1 (1C, **C-4**), 164.5 (1C, CO<sub>2</sub>Et), 154.4 (1C, **C-7**), 152.3 (1C, **C-5**), 150.3 (1C, **C-2**), 145.8 (1C, **C-8a**), 122.8 (1C, **C-4a**), 114.6 (1C, **C-3**), 109.2 (1C, **C-8**), 61.3 (1C, OCH<sub>2</sub>CH<sub>3</sub>), 53.3 (1C, NCH<sub>2</sub>CH<sub>2</sub>CH<sub>2</sub>CH<sub>3</sub>), 30.6 (1C, NCH<sub>2</sub>CH<sub>2</sub>CH<sub>2</sub>CH<sub>3</sub>), 19.8 (1C, NCH<sub>2</sub>CH<sub>2</sub>CH<sub>2</sub>CH<sub>3</sub>), 14.3 (1C, NCH<sub>2</sub>CH<sub>2</sub>CH<sub>2</sub>CH<sub>3</sub>), 13.5 (1C, OCH<sub>2</sub>CH<sub>3</sub>).

*Synthesis of 1-Butyl-7-morpholino-4-oxo-1,4-dihydro-1,6-naphthyridine-3-carboxylic acid hydrochloride (M)*

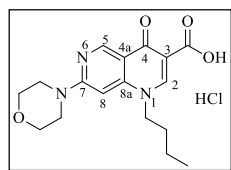

Under microwave irradiation 400 mg (1.30 mmol) ethyl 1-butyl-7-chloro-4-oxo-1,4-dihydro-1,6-naphthyridine-3-carboxylate (**K**) dissolved in 15 ml morpholine were heated to 85 °C for 1.5 h (heat-up rate: in 2 min to 85 °C, 600 W). The mixture was diluted with 30 ml water and extracted with DCM (4 x 50 ml). The combined organic layers were dried over Na<sub>2</sub>SO<sub>4</sub> and concentrated in vacuo.

The residue was suspended in 5 ml EtOH and 5 ml HCl-solution (6 M) and refluxed for 3 h. Afterwards the suspension was evaporated to dryness under reduced pressure and the crude product was recrystallized from EA/MeOH to give a yellow, crystalline solid.

Yield: 356 mg (968  $\mu\text{mol}$ , 75 %), mp: 257 - 259  $^{\circ}\text{C}$  (EA/MeOH).

**IR** (ATR),  $\tilde{\nu}$  [ $\text{cm}^{-1}$ ]: 2962 (w), 2856 (w), 2497 (br), 1710 (m), 1607 (s), 1525 (m), 1467 (s), 1418 (m), 1112 (m), 967 (m), 821 (m), 806 (m).

**$^1\text{H-NMR}$**  (DMSO- $d_6$ ,  $\delta$  [ppm],  $J$  [Hz]): 15.0 (s, 1H, COOH), 9.06 (s, 1H, **H-5**), 8.84 (s, 1H, **H-2**), 6.89 (s, 1H, **H-8**), 4.41 (t, 2H,  $^3J = 7.3$ ,  $\text{NCH}_2\text{CH}_2\text{CH}_2\text{CH}_3$ ), 3.73 (s, 8H, morpholino-**CH**<sub>2</sub>), 1.72 (quint, 2H,  $^3J = 7.3$ ,  $\text{NCH}_2\text{CH}_2\text{CH}_2\text{CH}_3$ ), 1.33 (sext, 2H,  $^3J = 7.3$ ,  $\text{NCH}_2\text{CH}_2\text{CH}_2\text{CH}_3$ ), 1.01 (t, 3H,  $^3J = 7.3$ ,  $\text{NCH}_2\text{CH}_2\text{CH}_2\text{CH}_3$ ).

**$^{13}\text{C-NMR}$**  (DMSO- $d_6$ ,  $\delta$  [ppm],  $J$  [Hz]): 177.2 (1C, **C-4**), 165.6 (1C, COOH), 160.7 (1C, **C-7**), 151.2 (1C, **C-2**), 149.9 (1C, **C-5**), 146.1 (1C, **C-8a**), 112.2 (1C, **C-4a**), 107.6 (1C, **C-3**), 88.7 (1C, **C-8**), 65.7 (2C, morpholino-**CH**<sub>2</sub>-**O-CH**<sub>2</sub>), 52.1 (1C,  $\text{NCH}_2\text{CH}_2\text{CH}_2\text{CH}_3$ ), 44.8 (2H, morpholino-**CH**<sub>2</sub>-**N-CH**<sub>2</sub>), 30.1 (1C,  $\text{NCH}_2\text{CH}_2\text{CH}_2\text{CH}_3$ ), 19.0 (1C,  $\text{NCH}_2\text{CH}_2\text{CH}_2\text{CH}_3$ ), 14.4 (1C,  $\text{NCH}_2\text{CH}_2\text{CH}_2\text{CH}_3$ ).

Synthesis of *N*-Benzyl-1-butyl-7-morpholino-4-oxo-1,4-dihydro-1,6-naphthyridine-3-carboxamide oxalate (GHQ237)

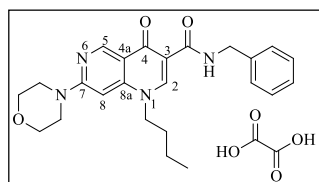

To a cooled solution (0  $^{\circ}\text{C}$ ) of 200 mg (544  $\mu\text{mol}$ ) 1-butyl-7-morpholino-4-oxo-1,4-dihydro-1,6-naphthyridine-3-carboxylic acid hydrochloride (M) and 275 mg (2.72 mmol, 299  $\mu\text{l}$ ) NMM in 10 ml anhydrous DMF 298 mg (2.18 mmol, 285  $\mu\text{l}$ ) isobutyl chloroformate were added dropwise under argon atmosphere. After 1 h at 0  $^{\circ}\text{C}$  234 mg (2.18 mmol, 238  $\mu\text{l}$ ) benzylamine were added and stirring at rt was continued for 45 min. The solvent was removed in vacuo and the crude product was purified via normal phase column chromatography on silica gel ( $\text{CHCl}_3/\text{EtOH}$  20:1,  $R_f$ : 0.49). The resulting solid was dissolved in 4 ml ACN and a solution of 245 mg (2.72 mmol) oxalic acid in 6 ml ACN was added dropwise. At -20  $^{\circ}\text{C}$  the oxalic salt precipitated and was recrystallized from ACN.

Yield: 217 mg (465  $\mu\text{mol}$ , 85 %), mp: 178 - 179  $^{\circ}\text{C}$  (ACN).

CHN: *calculated* C: 64.50, H: 6.28, N: 12.04, O: 17.18 (for **API/Ox** 1:0.5), *found* C: 64.42, H: 6.29, N: 11.98.

Stoichiometry: **API/Ox** 1:0.5.

**IR** (ATR),  $\tilde{\nu}$  [ $\text{cm}^{-1}$ ]: 3171 (w), 3056 (m), 2954 (m), 2911 (m), 2867 (m), 2603 (w), 1734 (m), 1645 (s), 1610 (s), 1552 (s), 1467 (m), 1454 (m), 1440 (m), 1363 (m), 1192 (s), 1118 (m), 813 (m), 736 (m), 682 (m).

**$^1\text{H-NMR}$**  ( $\text{DMSO-}d_6$ ,  $\delta$  [ppm],  $J$  [Hz]): 10.2 (t, 1H,  $^3J = 5.8$ , CONHR), 9.02 (s, 1H, **H-5**), 8.70 (s, 1H, **H-2**), 7.37-7.24 (m, 5H, benzyl- $\text{CH}_{\text{arom.}}$ ), 6.63 (s, 1H, **H-8**), 4.53 (d, 2H,  $^3J = 5.8$ , benzyl- $\text{CH}_2$ ), 4.34 (t, 2H,  $^3J = 7.3$ ,  $\text{NCH}_2\text{CH}_2\text{CH}_2\text{CH}_3$ ), 3.73-3.63 (m, 8H, morpholino- $\text{CH}_2$ ), 1.72 (quint, 2H,  $^3J = 7.3$ ,  $\text{NCH}_2\text{CH}_2\text{CH}_2\text{CH}_3$ ), 1.31 (sext, 2H,  $^3J = 7.3$ ,  $\text{NCH}_2\text{CH}_2\text{CH}_2\text{CH}_3$ ), 0.91 (t, 3H,  $^3J = 7.3$ ,  $\text{NCH}_2\text{CH}_2\text{CH}_2\text{CH}_3$ ).

**$^{13}\text{C-NMR}$**  ( $\text{DMSO-}d_6$ ,  $\delta$  [ppm],  $J$  [Hz]): 175.4 (1C, **C-4**), 163.7 (1C, CONHR), 160.8 (1C, **C-7**), 160.5 (Oxalat), 149.9 (1C, **C-5**), 149.7 (1C, **C-2**), 146.0 (1C, **C-8a**), 139.2 (1C, benzyl- $\text{C}_q$ ), 128.4 (2C, benzyl- $\text{CH}_{\text{arom.}}$ ), 127.3 (2C, benzyl- $\text{CH}_{\text{arom.}}$ ), 126.8 (1C, benzyl- $\text{CH}_{\text{arom.}}$ ), 114.2 (1C, **C-4a**), 111.4 (1C, **C-3**), 88.5 (1C, **C-8**), 65.7 (2C, morpholino- $\text{CH}_2\text{-O-CH}_2$ ), 51.6 (1C,  $\text{NCH}_2\text{CH}_2\text{CH}_2\text{CH}_3$ ), 44.8 (2H, morpholino- $\text{CH}_2\text{-N-CH}_2$ ), 42.1 (1C, benzyl- $\text{CH}_2$ ), 30.1 (1C,  $\text{NCH}_2\text{CH}_2\text{CH}_2\text{CH}_3$ ), 19.0 (1C,  $\text{NCH}_2\text{CH}_2\text{CH}_2\text{CH}_3$ ), 13.5 (1C,  $\text{NCH}_2\text{CH}_2\text{CH}_2\text{CH}_3$ ).

### **Synthesis of N-Benzyl-1-(2-(dimethylamino)ethyl)-6-fluoro-7-morpholino-4-oxo-1,4-dihydroquinoline-3-carboxamide oxalate (GHQ243)**

#### **Synthesis of Ethyl 7-chloro-1-(2-(dimethylamino)ethyl)-6-fluoro-4-oxo-1,4-dihydroquinoline-3-carboxylate (N)**

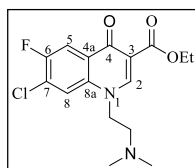

1.00 g (3.71 mmol) ethyl 7-chloro-6-fluoro-4-hydroxyquinolin-3-carboxylate (**B**) and 769 mg (5.57 mmol)  $\text{K}_2\text{CO}_3$  were suspended in 15 ml anhydrous DMF under argon atmosphere and stirred at rt for 30 min. A catalytic amount of KI and 588 mg (4.08 mmol) 2-chloro-*N,N*-dimethylethylamine hydrochloride were added and the mixture was heated to 100 °C for 16 h. The solvent was removed in vacuo and the residue was partitioned between 50 ml water and 50 ml EA. The organic layer was separated and the aqueous layer was extracted with EA (2 x 50 ml). After drying the combined organic layers over  $\text{Na}_2\text{SO}_4$  and evaporating the solvent under reduced pressure the crude product was purified via normal phase column chromatography on silica gel ( $\text{CHCl}_3/\text{MeOH}/\text{conc. NH}_3$  150:10:1,  $R_f$ : 0.43) to give a white solid.

Yield: 480 mg (1.41 mmol, 38 %), mp: 140 - 141 °C ( $\text{CHCl}_3/\text{MeOH}/\text{conc. NH}_3$ ).

**IR** (ATR),  $\tilde{\nu}$  [ $\text{cm}^{-1}$ ]: 2981 (w), 2933 (w), 2871 (w), 2840 (w), 2776 (w), 1716 (s), 1611 (m), 1594 (m), 1548 (m), 1487 (s), 1460 (m), 1384 (m), 1313 (m), 1209 (m), 1160 (s), 1040 (m), 893 (m), 800 (m), 770 (m).

**$^1\text{H-NMR}$**  (DMSO- $d_6$ ,  $\delta$  [ppm],  $J$  [Hz]): 8.61 (s, 1H, **H-2**), 8.18 (d, 1H,  $^4J_{\text{H,F}} = 6.0$ , **H-8**), 8.03 (d, 1H,  $^3J_{\text{H,F}} = 9.4$ , **H-5**), 4.47 (t, 2H,  $^3J = 5.7$ ,  $\text{NCH}_2\text{CH}_2\text{N}(\text{CH}_3)_2$ ), 4.23 (q, 2H,  $^3J = 7.1$ ,  $\text{OCH}_2\text{CH}_3$ ), 2.58 (t, 2H,  $^3J = 5.7$ ,  $\text{NCH}_2\text{CH}_2\text{N}(\text{CH}_3)_2$ ), 2.18 (s, 6H,  $\text{NCH}_2\text{CH}_2\text{N}(\text{CH}_3)_2$ ), 1.28 (t, 3H,  $^3J = 7.1$ ,  $\text{OCH}_2\text{CH}_3$ ).

**$^{13}\text{C-NMR}$**  (DMSO- $d_6$ ,  $\delta$  [ppm],  $J$  [Hz]): 171.2 (d, 1C,  $^4J_{\text{C,F}} = 2.3$ , **C-4**), 164.3 (1C, COOEt), 154.2 (d, 1C,  $^1J_{\text{C,F}} = 246.9$ , **C-6**), 150.5 (1C, **C-2**), 135.9 (d, 1C,  $^4J_{\text{C,F}} = 1.8$ , **C-8a**), 128.6 (d, 1C,  $^3J_{\text{C,F}} = 5.4$ , **C-4a**), 125.3 (d, 1C,  $^2J_{\text{C,F}} = 20.0$ , **C-7**), 120.1 (1C, **C-8**), 112.4 (d, 1C,  $^2J_{\text{C,F}} = 22.4$ , **C-5**), 109.1 (1C, **C-3**), 59.8 (1C,  $\text{OCH}_2\text{CH}_3$ ), 56.9 (1C,  $\text{NCH}_2\text{CH}_2\text{N}(\text{CH}_3)_2$ ), 50.4 (1C,  $\text{NCH}_2\text{CH}_2\text{N}(\text{CH}_3)_2$ ), 45.2 (2C,  $\text{NCH}_2\text{CH}_2\text{N}(\text{CH}_3)_2$ ), 14.2 (1C,  $\text{OCH}_2\text{CH}_3$ ).

Synthesis of 1-(2-(Dimethylamino)ethyl)-6-fluoro-7-morpholino-4-oxo-1,4-dihydroquinoline-3-carboxylic acid hydrochloride (O)

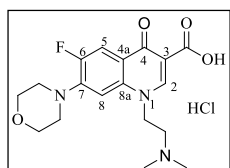

670 mg (1.97 mmol) ethyl 7-chloro-1-(2-(dimethylamino)ethyl)-6-fluoro-4-oxo-1,4-dihydroquinoline-3-carboxylate (**N**) were suspended in 5 ml EtOH and 5 ml aqueous HCl-solution (6 M) and heated to reflux for 4 h. The suspension was evaporated to dryness under reduced pressure and the residue

was dissolved in 15 ml morpholine. The solution was heated to 100 °C for 4 h under microwave irradiation (heat-up rate: in 3 min to 100 °C, 600W). Excess of morpholine was removed in vacuo and the remaining oil was dissolved in 10 ml MeOH. After addition of 1.5 ml isopropanolic HCl-solution (6 M) the precipitate was filtered off and recrystallized from MeOH/water in order to give the desired product as hydrochlorid salt.

Yield: 276 mg (690  $\mu\text{mol}$ , 35 %), 298 - 299 °C (MeOH/water).

**IR** (ATR),  $\tilde{\nu}$  [ $\text{cm}^{-1}$ ]: 3246 (w), 3046 (w), 2968 (w), 2903 (w), 2864 (m), 2373 (br), 1700 (s), 1622 (s), 1523 (m), 1488 (s), 1468 (m), 1385 (m), 1267 (s), 1118 (s), 1036 (m), 884 (m), 807 (m), 752 (m).

**$^1\text{H-NMR}$**  (DMSO- $d_6$ ,  $\delta$  [ppm],  $J$  [Hz]): 15.2 (s, 1H, COOH), 11.5 (br, 1H,  $\text{NH}^+$ ), 9.03 (s, 1H, **H-2**), 7.94 (d, 1H,  $^3J_{\text{H,F}} = 13.4$ , **H-5**), 7.26 (d, 1H,  $^4J_{\text{H,F}} = 7.1$ , **H-8**), 5.03 (t, 2H,  $^3J = 7.2$ ,  $\text{NCH}_2\text{CH}_2\text{N}(\text{CH}_3)_2$ ), 3.79 (br, 4H, morpholino- $\text{CH}_2\text{-O-CH}_2$ ), 3.53 (br, 2H,  $\text{NCH}_2\text{CH}_2\text{N}(\text{CH}_3)_2$ ), 3.40 (br, 4H, morpholino- $\text{CH}_2\text{-N-CH}_2$ ), 2.83 (s, 6H,  $\text{CH}_2\text{CH}_2\text{N}(\text{CH}_3)_2$ ).

<sup>13</sup>C-NMR (DMSO-*d*<sub>6</sub>, δ [ppm], *J* [Hz]): 176.3 (d, 1C, <sup>4</sup>*J*<sub>C,F</sub> = 2.3, C-4), 165.7 (1C, COOH), 152.7 (d, 1C, <sup>1</sup>*J*<sub>C,F</sub> = 249.5, C-6), 149.7 (1C, C-2), 145.5 (d, 1C, <sup>2</sup>*J*<sub>C,F</sub> = 9.9, C-7), 137.3 (1C, C-8a), 119.1 (d, 1C, <sup>3</sup>*J*<sub>C,F</sub> = 7.8, C-4a), 111.3 (d, 1C, <sup>2</sup>*J*<sub>C,F</sub> = 23.1, C-5), 107.3 (1C, C-3), 105.5 (d, 1C, <sup>3</sup>*J*<sub>C,F</sub> = 3.3, C-8), 65.8 (2C, morpholino-CH<sub>2</sub>-O-CH<sub>2</sub>), 53.0 (1C, NCH<sub>2</sub>CH<sub>2</sub>N(CH<sub>3</sub>)<sub>2</sub>), 50.0 (2C, <sup>4</sup>*J*<sub>C,F</sub> = 4.8, morpholino-CH<sub>2</sub>-N-CH<sub>2</sub>), 47.6 (1C, NCH<sub>2</sub>CH<sub>2</sub>N(CH<sub>3</sub>)<sub>2</sub>), 42.2 (2C, NCH<sub>2</sub>CH<sub>2</sub>N(CH<sub>3</sub>)<sub>2</sub>).

Synthesis of *N*-Benzyl-1-(2-(dimethylamino)ethyl)-6-fluoro-7-morpholino-4-oxo-1,4-dihydroquinoline-3-carboxamide oxalate (GHQ243)

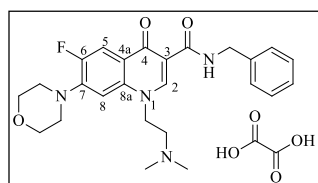

To a cooled solution (0 °C) of 250 mg (625 μmol) 1-(2-(dimethylamino)ethyl)-6-fluoro-7-morpholino-4-oxo-1,4-dihydroquinoline-3-carboxylic acid hydrochloride (O) and 506 mg (2.50 mmol, 273 μl) NMM in 10 ml anhydrous DMF 342 mg (2.50 mmol, 326 μl) isobutyl chloroformate were added dropwise under argon atmosphere. After 1 h at 0 °C 268 mg (2.50 mmol, 273 μl) benzylamine were added and stirring at rt was continued for 45 min. The solvent was removed in vacuo and the crude product was purified via normal phase column chromatography on silica gel (CHCl<sub>3</sub>/MeOH/conc. NH<sub>3</sub> 100:10:1, R<sub>f</sub>: 0.65). The resulting solid was dissolved in 4 ml ACN and a solution of 281 mg (3.13 mmol) oxalic acid in 6 ml ACN was added dropwise. After 30 min of agitating at rt the oxalic salt precipitated which was recrystallized from MeOH.

Yield: 145 mg (267 μmol, 43 %), mp: 227 - 228 °C (MeOH).

CHN: *calculated* C: 59.77, H: 5.76, F: 3.50, N: 10.33, O: 20.64 (for **API/Ox** 1:1), *found* C: 59.62, H: 5.62, N: 10.36.

Stoichiometry: **API/Ox** 1:1.

**IR** (ATR),  $\tilde{\nu}$  [cm<sup>-1</sup>]: 3175 (w), 3056 (m), 2981 (w), 2885 (w), 2815 (w), 2716 (br), 1717 (br), 1635 (s), 1572 (s), 1490 (s), 1450 (m), 1360 (m), 1251 (m), 1171 (m), 1122 (m), 1001 (m), 932 (m), 745 (m), 694 (m).

<sup>1</sup>H-NMR (DMSO-*d*<sub>6</sub>, δ [ppm], *J* [Hz]): 10.3 (t, 1H, <sup>3</sup>*J* = 5.8, CONHR), 8.86 (s, 1H, H-2), 7.88 (d, 1H, <sup>3</sup>*J*<sub>H,F</sub> = 13.6, H-5), 7.35-7.23 (m, 5H, benzyl-CH<sub>arom</sub>), 7.12 (d, 1H, <sup>4</sup>*J*<sub>H,F</sub> = 7.0, H-8), 4.79 (t, 2H, <sup>3</sup>*J* = 6.8, NCH<sub>2</sub>CH<sub>2</sub>N(CH<sub>3</sub>)<sub>2</sub>), 4.56 (d, 2H, <sup>3</sup>*J* = 5.8, benzyl-CH<sub>2</sub>), 3.79 (br, 4H, morpholino-CH<sub>2</sub>-O-CH<sub>2</sub>), 3.28 (br, 6H, morpholino-CH<sub>2</sub>-N-CH<sub>2</sub>, NCH<sub>2</sub>CH<sub>2</sub>N(CH<sub>3</sub>)<sub>2</sub>), 2.68 (s, 6H, NCH<sub>2</sub>CH<sub>2</sub>N(CH<sub>3</sub>)<sub>2</sub>).

<sup>13</sup>C-NMR (DMSO-*d*<sub>6</sub>, δ [ppm], *J* [Hz]): 174.2 (d, 1C, <sup>4</sup>*J*<sub>C,F</sub> = 2.2, C-4), 163.9 (1C, CONHR), 163.8 (Oxalat), 152.4 (d, 1C, <sup>1</sup>*J*<sub>C,F</sub> = 247.5, C-6), 148.5 (1C, C-2), 144.6 (d, 1C, <sup>2</sup>*J*<sub>C,F</sub> = 9.9, C-7), 139.3 (1C, benzyl-C<sub>q</sub>), 136.6 (1C, C-8a), 128.3 (2C, benzyl-CH<sub>arom.</sub>), 127.3 (2C, benzyl-CH<sub>arom.</sub>), 126.8 (1C, benzyl-CH<sub>arom.</sub>), 121.2 (d, 1C, <sup>3</sup>*J*<sub>C,F</sub> = 7.1, C-4a), 111.5 (d, 1C, <sup>2</sup>*J*<sub>C,F</sub> = 22.9, C-5), 110.4 (1C, C-3), 105.2 (d, 1C, <sup>3</sup>*J*<sub>C,F</sub> = 2.3, C-8), 65.9 (2C, morpholino-CH<sub>2</sub>-O-CH<sub>2</sub>), 54.2 (1C, NCH<sub>2</sub>CH<sub>2</sub>N(CH<sub>3</sub>)<sub>2</sub>), 49.9 (2C, <sup>4</sup>*J*<sub>C,F</sub> = 4.4, morpholino-CH<sub>2</sub>-N-CH<sub>2</sub>), 48.2 (1C, NCH<sub>2</sub>CH<sub>2</sub>N(CH<sub>3</sub>)<sub>2</sub>), 43.3 (2C, NCH<sub>2</sub>CH<sub>2</sub>N(CH<sub>3</sub>)<sub>2</sub>), 42.1 (1C, benzyl-CH<sub>2</sub>).

**Synthesis of 1-Butyl-N-(4-(2-(dimethylamino)ethoxy)benzyl)-6-fluoro-7-morpholino-4-oxo-1,4-dihydroquinoline-3-carboxamide oxalate (GHQ250)**

*Synthesis of tert-Butyl-4-hydroxybenzylcarbamate (P) (6)*

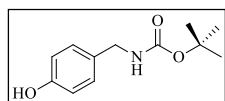

905 mg (7.35 mmol) 4-hydroxybenzylamine, 2.41 g (11.0 mmol) di-*tert*-butyl dicarbonate and 1.24 g (14.7 mmol) NaHCO<sub>3</sub> were suspended in 20 ml MeOH and stirred at rt for 16 h. The solvent was removed in vacuo, the residue was dissolved in 20 ml water and extracted with DCM (4 x 50 ml). After drying the combined organic layers over Na<sub>2</sub>SO<sub>4</sub> and concentrating under reduced pressure the crude product was purified by normal phase column chromatography on silica gel (PE/EA 2:1, R<sub>f</sub>: 0.69) to give a colorless oil.

Yield: 1.20 g (5.37 mmol, 73 %).

Spectroscopical data were consistent with literature (6).

*Synthesis of 2-(4-(Aminomethyl)phenoxy)-N,N-dimethylethanamine (O) (7)*

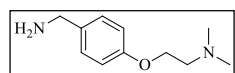

Under argon atmosphere 600 mg (2.69 mmol) *tert*-butyl-4-hydroxybenzylcarbamate (P) were added portionwise to a cooled suspension (0 °C) of 215 mg (5.38 mmol) sodium hydride (60 % dispersion in mineral oil) in 10 ml anhydrous DMF. After 30 min at 0 °C 465 mg (3.23 mmol) 2-chloro-*N,N*-dimethylethanamine hydrochloride dissolved in 10 ml anhydrous DMF were added dropwise and the resulting solution was stirred at rt for 15 h. The solvent was removed in vacuo and the residue was partitioned between 50 ml water and 50 ml DCM. The organic layer was separated and the aqueous layer was extracted with DCM (3 x 50 ml). The combined organic layers were dried over Na<sub>2</sub>SO<sub>4</sub>, the solvent was evaporated under reduced pressure and the residue was purified by means of normal phase column chromatography on silica gel (CHCl<sub>3</sub>/methanolic NH<sub>3</sub> (6 M) 40:1, R<sub>f</sub>: 0.85). For

deprotection the intermediate was dissolved in 10 ml DCM and 4 ml TFA were added. After stirring the mixture for 2 h at rt the solvent was removed in vacuo and the residue was dissolved in 50 ml water. The pH was adjusted to 9 - 10 using aqueous NaOH-solution (2 M) and the mixture was extracted with DCM (4 x 50 ml). The combined organic layers were dried over Na<sub>2</sub>SO<sub>4</sub> and concentrated under reduced pressure to give the desired product as colorless oil.

Yield: 193 mg (995 μmol, 37 %).

**IR** (ATR),  $\tilde{\nu}$  [cm<sup>-1</sup>]: 3361 (w), 3275 (w), 2940 (m), 2863 (m), 2821 (m), 2770 (m), 1610 (m), 1583 (m), 1510 (s), 1463 (m), 1239 (s), 1031 (m), 811 (m).

**<sup>1</sup>H-NMR** (CDCl<sub>3</sub>, δ [ppm], *J* [Hz]): 7.21 (d, 2H, <sup>3</sup>*J* = 8.6, benzyl-CH<sub>arom.</sub>), 6.89 (d, 2H, <sup>3</sup>*J* = 8.6, benzyl-CH<sub>arom.</sub>), 4.06 (t, 2H, <sup>3</sup>*J* = 5.8, OCH<sub>2</sub>CH<sub>2</sub>N), 3.80 (s, 2H, benzyl-CH<sub>2</sub>), 2.72 (t, 2H, <sup>3</sup>*J* = 5.8, OCH<sub>2</sub>CH<sub>2</sub>N), 2.33 (s, 6H, N(CH<sub>3</sub>)<sub>2</sub>), 1.54 (s, 2H, NH<sub>2</sub>).

**<sup>13</sup>C-NMR** (CDCl<sub>3</sub>, δ [ppm], *J* [Hz]): 157.8 (1C, benzyl-C<sub>q</sub>), 135.7 (1C, benzyl-C<sub>q</sub>), 128.2 (2C, benzyl-CH<sub>arom.</sub>), 114.6 (2C, benzyl-CH<sub>arom.</sub>), 66.1 (1C, OCH<sub>2</sub>CH<sub>2</sub>N), 58.3 (1C, OCH<sub>2</sub>CH<sub>2</sub>N), 45.9 (1C, benzyl-CH<sub>2</sub>), 45.8 (2C, N(CH<sub>3</sub>)<sub>2</sub>).

*Synthesis of 1-Butyl-N-(4-(2-(dimethylamino)ethoxy)benzyl)-6-fluoro-7-morpholino-4-oxo-1,4-dihydroquinoline-3-carboxamide oxalate (GHQ250)*

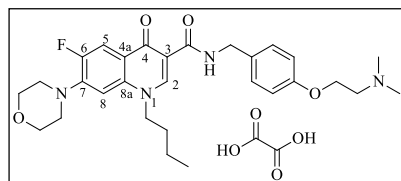

To a cooled solution (0 °C) of 100 mg (287 μmol) 1-butyl-6-fluoro-7-morpholino-4-oxo-1,4-dihydroquinoline-3-carboxylic acid (D) and 116 mg (1.15 mmol, 125 μl) NMM in 10 ml anhydrous DMF 118 mg (862 μmol, 112 μl) isobutyl chloroformate were added dropwise under argon atmosphere. After 1 h at 0 °C 168 mg (862 μmol) 2-(4-(aminomethyl)phenoxy)-*N,N*-dimethylethanamine (Q) were added and stirring at rt was continued for 45 min. The solvent was removed in vacuo and the crude product was purified via normal phase column chromatography on silica gel (CHCl<sub>3</sub>/MeOH/ conc. NH<sub>3</sub> 100:10:1, R<sub>f</sub>: 0.81). The resulting solid was dissolved in 4 ml ACN and a solution of 129 mg (1.44 mmol) oxalic acid in 6 ml ACN were added dropwise. At -20 °C the oxalic salt precipitated which was recrystallized from ACN.

Yield: 103 mg (156 μmol, 54 %), mp: 172 - 173 °C (ACN).

CHN: *calculated* C: 58.26, H: 6.11, F: 2.88, N: 8.49, O: 24.25 (for **API/Ox** 1:1.5), *found* C: 58.57, H: 6.33, N: 8.71.

Stoichiometry: **API/Ox** 1:1.5.



**IR** (ATR),  $\tilde{\nu}$  [ $\text{cm}^{-1}$ ]: 3175 (w), 3034 (w), 2956 (w), 2925 (w), 2853 (w), 2593 (w), 1732 (br), 1645 (s), 1558 (m), 1490 (s), 1376 (w), 1241 (m), 1179 (m), 1117 (m), 934 (m), 802 (m), 681 (m).

**$^1\text{H-NMR}$**  (DMSO- $d_6$ ,  $\delta$  [ppm],  $J$  [Hz]): 10.3 (t, 1H,  $^3J = 5.7$ , CONHR), 8.77 (s, 1H, **H-2**), 7.85 (d, 1H,  $^3J_{\text{H,F}} = 13.6$ , **H-5**), 7.29 (d, 2H,  $^3J = 8.6$ , benzyl-**CH**<sub>arom.</sub>), 7.08 (d, 1H,  $^4J_{\text{H,F}} = 7.2$ , **H-8**), 6.96 (d, 2H,  $^3J = 8.6$ , benzyl-**CH**<sub>arom.</sub>), 4.48-4.46 (m, 4H, benzyl-**CH**<sub>2</sub>, **NCH**<sub>2</sub>CH<sub>2</sub>CH<sub>2</sub>CH<sub>3</sub>), 4.29 (t, 2H,  $^3J = 5.0$ , **OCH**<sub>2</sub>CH<sub>2</sub>N(CH<sub>3</sub>)<sub>2</sub>), 3.79-3.77 (m, 4H, morpholino-**CH**<sub>2</sub>-**O-CH**<sub>2</sub>), 3.44 (t, 2H,  $^3J = 5.0$ , **OCH**<sub>2</sub>CH<sub>2</sub>N(CH<sub>3</sub>)<sub>2</sub>), 3.25-2.24 (m, 4H, morpholino-**CH**<sub>2</sub>-**N-CH**<sub>2</sub>), 2.80 (s, 6H, **OCH**<sub>2</sub>CH<sub>2</sub>N(CH<sub>3</sub>)<sub>2</sub>), 1.75 (quint, 2H,  $^3J = 7.3$ , **NCH**<sub>2</sub>CH<sub>2</sub>CH<sub>2</sub>CH<sub>3</sub>), 1.30 (sext, 2H,  $^3J = 7.3$ , **NCH**<sub>2</sub>CH<sub>2</sub>CH<sub>2</sub>CH<sub>3</sub>), 0.91 (t, 3H,  $^3J = 7.3$ , **NCH**<sub>2</sub>CH<sub>2</sub>CH<sub>2</sub>CH<sub>3</sub>).

**$^{13}\text{C-NMR}$**  (DMSO- $d_6$ ,  $\delta$  [ppm],  $J$  [Hz]): 174.1 (d, 1C,  $^4J_{\text{C,F}} = 2.5$ , **C-4**), 164.0 (1C, CONHR), 163.4 (Oxalat), 156.6 (1C, benzyl-**C**<sub>q</sub>), 152.5 (d, 1C,  $^1J_{\text{C,F}} = 247.5$ , **C-6**), 147.8 (1C, **C-2**), 144.4 (d, 1C,  $^2J_{\text{C,F}} = 10.3$ , **C-7**), 136.6 (1C, **C-8a**), 132.3 (1C, benzyl-**C**<sub>q</sub>), 128.8 (2C, benzyl-**CH**<sub>arom.</sub>), 121.5 (d, 1C,  $^3J_{\text{C,F}} = 7.0$ , **C-4a**), 114.7 (2C, benzyl-**CH**<sub>arom.</sub>), 111.4 (d, 1C,  $^2J_{\text{C,F}} = 22.4$ , **C-5**), 110.0 (1C, **C-3**), 105.6 (d, 1C,  $^3J_{\text{C,F}} = 3.1$ , **C-8**), 65.9 (2C, morpholino-**CH**<sub>2</sub>-**O-CH**<sub>2</sub>), 62.4 (1C, **OCH**<sub>2</sub>CH<sub>2</sub>N(CH<sub>3</sub>)<sub>2</sub>), 55.3 (1C, **OCH**<sub>2</sub>CH<sub>2</sub>N(CH<sub>3</sub>)<sub>2</sub>), 52.9 (1C, **NCH**<sub>2</sub>CH<sub>2</sub>CH<sub>2</sub>CH<sub>3</sub>), 49.8 (2C,  $^4J_{\text{C,F}} = 4.4$ , morpholino-**CH**<sub>2</sub>-**N-CH**<sub>2</sub>), 42.8 (2C, **OCH**<sub>2</sub>CH<sub>2</sub>N(CH<sub>3</sub>)<sub>2</sub>), 41.6 (1C, benzyl-**CH**<sub>2</sub>), 30.3 (1C, **NCH**<sub>2</sub>CH<sub>2</sub>CH<sub>2</sub>CH<sub>3</sub>), 19.2 (1C, **NCH**<sub>2</sub>CH<sub>2</sub>CH<sub>2</sub>CH<sub>3</sub>), 13.5 (1C, **NCH**<sub>2</sub>CH<sub>2</sub>CH<sub>2</sub>CH<sub>3</sub>).

### **Synthesis of 1-Butyl-6-fluoro-7-morpholino-4-oxo-*N*-(pyridin-4-ylmethyl)-1,4-dihydroquinoline-3-carboxamide oxalate (GHQ242)**

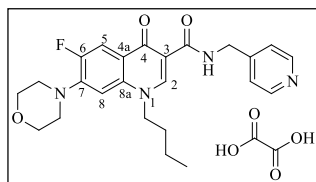

To a cooled solution (0 °C) of 150 mg (431  $\mu\text{mol}$ ) 1-butyl-6-fluoro-7-morpholino-4-oxo-1,4-dihydroquinoline-3-carboxylic acid (**D**) and 218 mg (2.16 mmol, 237  $\mu\text{l}$ ) NMM in 10 ml anhydrous DMF 235 mg (1.72 mmol, 224  $\mu\text{l}$ ) isobutyl chloroformate were added dropwise under argon atmosphere. After 1 h at 0 °C 186 mg (1.72 mmol, 175  $\mu\text{l}$ ) 4-(aminomethyl)pyridine were added and stirring at rt was continued for 45 min. The solvent was removed in vacuo and the crude product was purified via normal phase column chromatography on silica gel ( $\text{CHCl}_3/\text{PE}$  100:1,  $R_f$ : 0.49). The resulting solid was dissolved in 4 ml ACN and a solution of 194 mg (2.16 mmol) oxalic acid in 6 ml ACN was added dropwise. After 30 min of agitating at rt the oxalic salt precipitated which was recrystallized from ACN.

Yield: 87 mg (151  $\mu\text{mol}$ , 35 %), mp: 191 - 192 °C (ACN).

CHN: *calculated* C: 56.54, H: 5.27, F: 3.31, N: 9.77, O: 25.06 (for **API/Ox** 1:1.5), *found* C: 56.46, H: 5.28, N: 9.70.

Stoichiometry: **API/Ox** 1:1.5.

**IR** (ATR),  $\tilde{\nu}$  [ $\text{cm}^{-1}$ ]: 3235 (w), 3073 (w), 2957 (m), 2931 (w), 2871 (w), 2614 (br), 1905 (br), 1728 (br), 1660 (s), 1629 (s), 1530 (m), 1489 (s), 1451 (m), 1376 (w), 1258 (s), 1198 (m), 1114 (m), 932 (m), 799 (m), 692 (m).

**<sup>1</sup>H-NMR** (DMSO-*d*<sub>6</sub>,  $\delta$  [ppm], *J* [Hz]): 10.5 (t, 1H, <sup>3</sup>*J* = 5.8, CONHR), 8.78 (s, 1H, **H-2**), 8.55 (d, 2H, <sup>3</sup>*J* = 5.2, Py-CH), 7.90 (d, 1H, <sup>3</sup>*J*<sub>H,F</sub> = 13.5, **H-5**), 7.39 (d, 2H, <sup>3</sup>*J* = 5.2, Py-CH), 7.10 (d, 1H, <sup>4</sup>*J*<sub>H,F</sub> = 7.2, **H-8**), 4.62 (d, 2H, <sup>3</sup>*J* = 5.8, CH<sub>2</sub>), 4.48 (t, 2H, <sup>3</sup>*J* = 7.3, NCH<sub>2</sub>CH<sub>2</sub>CH<sub>2</sub>CH<sub>3</sub>), 3.80 (br, 4H, morpholino-CH<sub>2</sub>-O-CH<sub>2</sub>), 3.26 (br, 4H, morpholino-CH<sub>2</sub>-N-CH<sub>2</sub>), 1.77 (quint, 2H, <sup>3</sup>*J* = 7.3, NCH<sub>2</sub>CH<sub>2</sub>CH<sub>2</sub>CH<sub>3</sub>), 1.32 (sext, 2H, <sup>3</sup>*J* = 7.3, NCH<sub>2</sub>CH<sub>2</sub>CH<sub>2</sub>CH<sub>3</sub>), 0.92 (t, 3H, <sup>3</sup>*J* = 7.3, NCH<sub>2</sub>CH<sub>2</sub>CH<sub>2</sub>CH<sub>3</sub>).

**<sup>13</sup>C-NMR** (DMSO-*d*<sub>6</sub>,  $\delta$  [ppm], *J* [Hz]): 174.1 (d, 1C, <sup>4</sup>*J*<sub>C,F</sub> = 1.8, C-4), 164.5 (1C, CONHR), 161.0 (Oxalat), 152.5 (d, 1C, <sup>1</sup>*J*<sub>C,F</sub> = 248.0, C-6), 149.9 (1C, Py-C<sub>q</sub>), 148.6 (2C, Py-CH), 147.8 (1C, C-2), 144.3 (d, 1C, <sup>2</sup>*J*<sub>C,F</sub> = 10.4, C-7), 136.6 (1C, C-8a), 122.4 (2C, Py-CH), 121.4 (d, 1C, <sup>3</sup>*J*<sub>C,F</sub> = 6.6, C-4a), 111.4 (d, 1C, <sup>2</sup>*J*<sub>C,F</sub> = 22.7, C-5), 109.7 (1C, C-3), 105.5 (d, 1C, <sup>3</sup>*J*<sub>C,F</sub> = 2.0, C-8), 65.8 (2C, morpholino-CH<sub>2</sub>-O-CH<sub>2</sub>), 52.8 (1C, NCH<sub>2</sub>CH<sub>2</sub>CH<sub>2</sub>CH<sub>3</sub>), 49.8 (d, 2C, <sup>4</sup>*J*<sub>C,F</sub> = 4.4, morpholino-CH<sub>2</sub>-N-CH<sub>2</sub>), 41.2 (1C, CH<sub>2</sub>), 30.2 (1C, NCH<sub>2</sub>CH<sub>2</sub>CH<sub>2</sub>CH<sub>3</sub>), 19.1 (1C, NCH<sub>2</sub>CH<sub>2</sub>CH<sub>2</sub>CH<sub>3</sub>), 13.4 (1C, NCH<sub>2</sub>CH<sub>2</sub>CH<sub>2</sub>CH<sub>3</sub>).

## References:

1. **de la Cruz A EJ, Goya P, Martinez A., Pfleiderer W. 1992.** Tautomerism and Acidity in 4-Quinolone-3-carboxylic Acid Derivatives. *Tetrahedron* **48**: 6135-6150.
2. **Hiltensperger G, Jones NG, Niedermeier S, Stich A, Kaiser M, Jung J, Puhl S, Damme A, Braunschweig H, Meinel L, Engstler M, Holzgrabe U. 2012.** Synthesis and structure-activity relationships of new quinolone-type molecules against *Trypanosoma brucei*. *J Med Chem* **55**:2538-2548.
3. **Kellenberger JLD, J.; Reinelt, S. B. 2009.** Preparation of Clarithromycin Macrolide Derivatives as Antiinflammatory Agents.
4. **Kohlmann A, Zech SG, Li F, Zhou T, Squillace RM, Commodore L, Greenfield MT, Lu X, Miller DP, Huang WS, Qi J, Thomas RM, Wang Y, Zhang S, Dodd R, Liu S, Xu R, Xu Y, Miret JJ, Rivera V, Clackson T, Shakespeare WC, Dalgarno DC. 2013.**

Fragment growing and linking lead to novel nanomolar lactate dehydrogenase inhibitors. *J Med Chem* 56:1023-1040.

5. **Brunette SRK, J. M.; Lemieux, R. M.; Tschantz, M. A. 2006.** Preparation of Pyridine Derivatives Useful as Inhibitors of PKC-Theta for Treating Various Diseases.
6. **Chichak KS, Peters AJ, Cantrill SJ, Stoddart JF. 2005.** Nanoscale borromeates. *J Org Chem* 70:7956-7962.
7. **Löber OB, C.; Ebel, K.; Johann, P. . 2004.** Verfahren zur Herstellung von Aminoalkoxybenzylaminen und Aminoalkoxybenzonnitrilen als Zwischenprodukte.

**Abbreviations:**

mp: melting point

Ph<sub>2</sub>O: diphenyl ether

rt: room temperature

EA: ethyl acetate

NMM: *N*-methyl morpholine

ACN: acetonitrile

DIPEA: diisopropylamine

DCM: dichloromethane

FA: formic acid

sat: saturated

TFA: trifluoroacetic acid

## **1. Physicochemical characterization**

### **X-ray analysis**

#### **Method:**

For single crystal structure analysis of GHQ168, a suited crystal with a size of 0,072 x 0,112 x 0,19 mm<sup>3</sup> was selected. Data collection was carried out on a BRUKER AXS Apex II diffractometer (Mo-K $\alpha$  radiation;  $\lambda$ =71.07 pm) at 100 K with Helios-mirror using the BRUKER AXS Apex Suite Software package (1). Data processing was done with the Olex2 software package (2). Structure solution was carried out with olex.solve (3) using charge flipping methods. The model was refined with the olex2.refine refinement package using Gauss-Newton minimization (4). Integrity of symmetry was checked using PLATON (5). Non-hydrogen atoms were refined anisotropically by least square techniques, hydrogen atoms were refined with geometrical constraints regarding their positions. Crystallographic data are summarized in Table S1.

#### **References:**

1. **Bruker.** SMART Apex Suite 2001, Bruker AXS Inc., Madison, Wisconsin, USA.
2. **Bourhis LJ, Dolomanov OV, Gildea RJ, Howard JA, Puschmann H.** 2015. The anatomy of a comprehensive constrained, restrained refinement program for the modern computing environment- Olex2 dissected. *Acta Crystallogr A Found Adv* **71**:59-75.
3. **L. J. Bourhis OVD, R. J. Gildea, J. A. K. Howard, H. Puschmann.** 2011. olex.solve.
4. **L. J. Bourhis OVD, R. J. Gildea, J. A. K. Howard, H. Puschmann.** 2011. olex.refine.
5. **A. L. Spek.** 2003. Single-crystal structure validation with the program *PLATON*. *J. Appl. Cryst.* 2003, **36**:7-13.

| GHQ168                                                                                                                           |                                                                |
|----------------------------------------------------------------------------------------------------------------------------------|----------------------------------------------------------------|
| Formula sum                                                                                                                      | C <sub>25</sub> H <sub>28</sub> FN <sub>3</sub> O <sub>3</sub> |
| Formula wgt /gmol <sup>-1</sup>                                                                                                  | 437.514                                                        |
| <i>a</i> /pm                                                                                                                     | 842.8(2)                                                       |
| <i>b</i> /pm                                                                                                                     | 1708.3(3)                                                      |
| <i>c</i> /pm                                                                                                                     | 1753.3(4)                                                      |
| $\alpha$ /°                                                                                                                      | 61.06(3)                                                       |
| $\beta$ /°                                                                                                                       | 83.56(3)                                                       |
| $\gamma$ /°                                                                                                                      | 83.83(3)                                                       |
| <i>V</i> /10 <sup>6</sup> pm <sup>3</sup>                                                                                        | 2191(1)                                                        |
| Crystal system                                                                                                                   | Triclinic                                                      |
| Space group                                                                                                                      | <i>P</i> $\bar{1}$                                             |
| <i>Z</i>                                                                                                                         | 4                                                              |
| <i>d</i> <sub>calcd</sub> /gcm <sup>-3</sup>                                                                                     | 1.3156                                                         |
| $\mu$ /cm <sup>-1</sup>                                                                                                          | 0.93                                                           |
| <i>T</i> /K                                                                                                                      | 173                                                            |
| Data range /°                                                                                                                    | 1.33 ≤ 2θ ≤ 26.59                                              |
| X-ray radiation                                                                                                                  | Mo-K <sub>α</sub> , λ = 71.073 pm                              |
| Diffractometer                                                                                                                   | Bruker APEX-II CCD                                             |
| Reflections                                                                                                                      | 21713                                                          |
| Unique reflections                                                                                                               | 9082                                                           |
| <i>R</i> (int)                                                                                                                   | 0.0756                                                         |
| No. parameters ref.                                                                                                              | 575                                                            |
| <i>R</i> <sub>1</sub> <sup>a)</sup> for <i>n</i> reflections with <i>F</i> <sub>o</sub> > 4σ ( <i>F</i> <sub>o</sub> ), <i>n</i> | 0.0732                                                         |
| <i>R</i> <sub>1</sub> (all)                                                                                                      | 0.1652                                                         |
| <i>wR</i> <sub>2</sub> <sup>b)</sup> (all)                                                                                       | 0.2304                                                         |
| <i>S</i> <sup>c)</sup>                                                                                                           | 1.0637                                                         |
| Rem. elec. density /10 <sup>-6</sup> epm                                                                                         | 0.9876/-0.7158                                                 |

a)  $R_1 = \sum ||F_o| - |F_c|| / \sum |F_o|$ . b)  $wR_2 = [\sum (w(F_o^2 - F_c^2)^2) / \sum (w(F_o^2)^2)]^{1/2}$ .

c)  $\text{Goof} = S = [\sum (w(F_o^2 - F_c^2)^2) / (n-p)]^{1/2}$  with *F*<sub>o</sub>, *F*<sub>c</sub> = observed and calculated structure factors, *n* = number of observed reflections.

**TABLE S1** Crystallographic data of single crystal X-ray diffraction of GHQ168. Deviations are given in brackets.

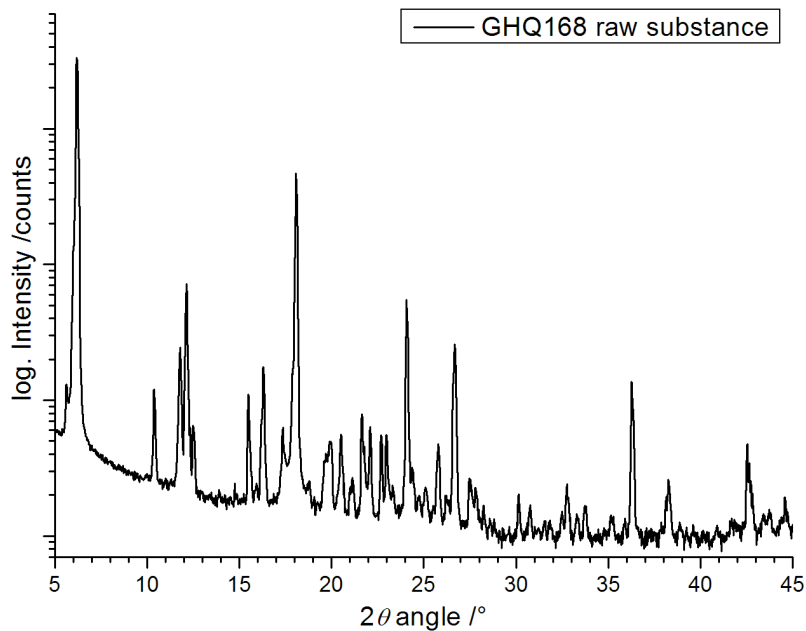

**FIG S1A** XRPD (Bruker D8 Discover, Billerica, USA) data show characteristic crystal reflexes for GHQ168.

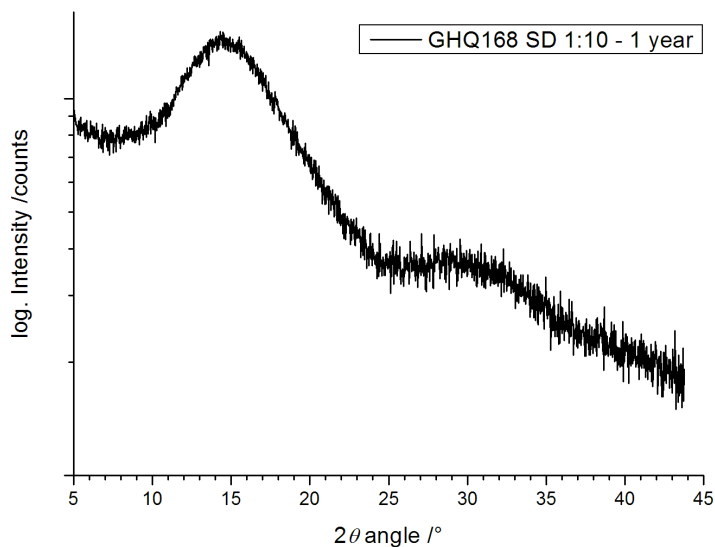

**FIG S1B** The spray dried formulation of GHQ168 and Eudragit L100 shows a broad amorphous signal. No recrystallization events occurred after 12 month.

## Scanning electron microscopy (SEM)

### Method:

For the characterization of particle morphology, scanning electron microscopy (JSM-7500F, Jeol, Japan) was used with an accelerating voltage of 2.0 kV and a 1000-fold magnification at a working distance of 8.6 mm.

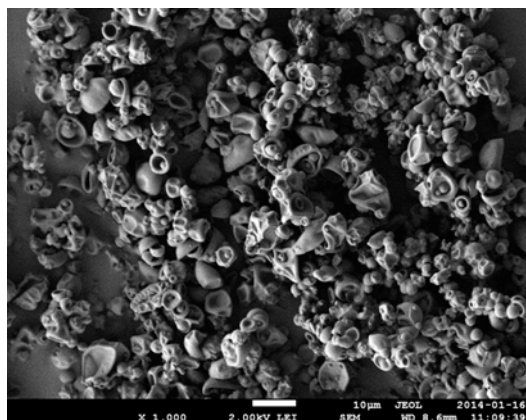

**FIG S2** Scanning electron micrographs of spray dried particles of GHQ168 and Eudragit® L100 (1+10 w/w) revealed that the particle size distribution was within a narrow range. The morphology complies with desired specifications such as smooth surface and spherical form.

## Dynamic Light Scattering (DLS)

### Method:

A solution of GHQ168 spray dried with Eudragit L100 (2 g/l) was prepared in PBS buffer and filtered using syringe filters (5  $\mu\text{m}$ ).

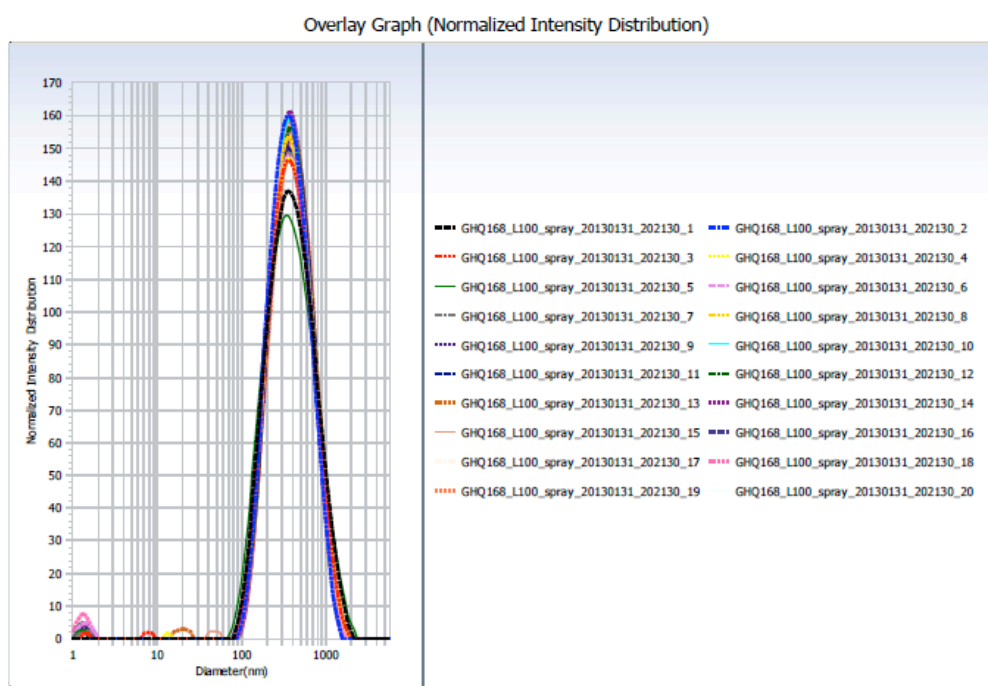

| No | Data                                 | Repet. No | pH | Ave. Diameter(nm) | Polydispersity Index | D (10%) (nm) | D (50%) (nm) | D (90%) (nm) |
|----|--------------------------------------|-----------|----|-------------------|----------------------|--------------|--------------|--------------|
| 1  | GHQ168_L100_spray_20130131_202130_1  | 1         | NA | 331.7             | 0.236                | 164.5        | 363.8        | 842.3        |
| 2  | GHQ168_L100_spray_20130131_202130_2  | 2         | NA | 340.4             | 0.226                | 175.6        | 349.2        | 712.2        |
| 3  | GHQ168_L100_spray_20130131_202130_3  | 3         | NA | 330.3             | 0.223                | 169.7        | 359.0        | 786.7        |
| 4  | GHQ168_L100_spray_20130131_202130_4  | 4         | NA | 330.1             | 0.226                | 171.4        | 360.5        | 785.9        |
| 5  | GHQ168_L100_spray_20130131_202130_5  | 5         | NA | 317.7             | 0.256                | 150.7        | 349.3        | 859.0        |
| 6  | GHQ168_L100_spray_20130131_202130_6  | 6         | NA | 325.8             | 0.218                | 164.6        | 352.5        | 754.6        |
| 7  | GHQ168_L100_spray_20130131_202130_7  | 7         | NA | 328.5             | 0.218                | 167.4        | 357.8        | 758.6        |
| 8  | GHQ168_L100_spray_20130131_202130_8  | 8         | NA | 329.7             | 0.204                | 173.3        | 355.4        | 744.4        |
| 9  | GHQ168_L100_spray_20130131_202130_9  | 9         | NA | 331.7             | 0.212                | 171.0        | 362.8        | 743.1        |
| 10 | GHQ168_L100_spray_20130131_202130_10 | 10        | NA | 329.4             | 0.203                | 177.2        | 356.9        | 723.2        |
| 11 | GHQ168_L100_spray_20130131_202130_11 | 11        | NA | 333.0             | 0.227                | 168.9        | 349.1        | 753.6        |
| 12 | GHQ168_L100_spray_20130131_202130_12 | 12        | NA | 333.1             | 0.213                | 174.4        | 363.3        | 738.4        |
| 13 | GHQ168_L100_spray_20130131_202130_13 | 13        | NA | 332.5             | 0.214                | 176.5        | 362.5        | 734.5        |
| 14 | GHQ168_L100_spray_20130131_202130_14 | 14        | NA | 337.3             | 0.195                | 179.0        | 360.0        | 721.3        |
| 15 | GHQ168_L100_spray_20130131_202130_15 | 15        | NA | 337.8             | 0.218                | 176.0        | 374.3        | 763.3        |
| 16 | GHQ168_L100_spray_20130131_202130_16 | 16        | NA | 341.3             | 0.208                | 178.6        | 369.0        | 771.1        |
| 17 | GHQ168_L100_spray_20130131_202130_17 | 17        | NA | 341.5             | 0.204                | 179.5        | 368.1        | 768.0        |
| 18 | GHQ168_L100_spray_20130131_202130_18 | 18        | NA | 342.0             | 0.204                | 176.1        | 363.8        | 755.8        |
| 19 | GHQ168_L100_spray_20130131_202130_19 | 19        | NA | 338.4             | 0.222                | 176.2        | 374.5        | 770.5        |
| 20 | GHQ168_L100_spray_20130131_202130_20 | 20        | NA | 342.4             | 0.202                | 180.6        | 366.1        | 778.9        |

**FIG S3** Subsequent DLS measurements were performed in order to monitor the pattern in solution (20 subsequent measurements are depicted above) and particle size did not change significantly over time.



## Caco-2 monolayers

### Caco-2 permeability assay

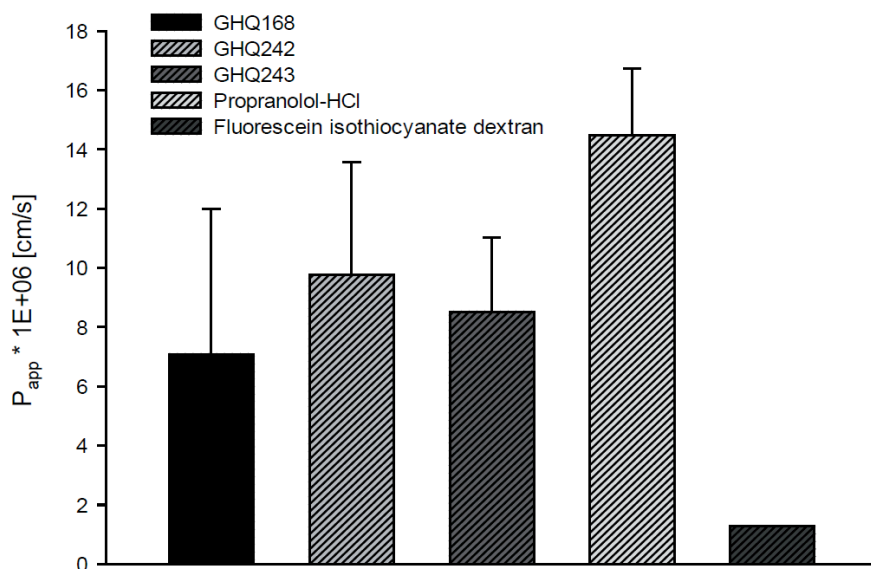

**FIG S4** Caco-2 Cell assays illustrating the equal permeability of GHQ168, GHQ242, GHQ243, and Propranolol-HCl.

|           | $P_{app} \times 10^6$ cm/s |        |        |        |             |
|-----------|----------------------------|--------|--------|--------|-------------|
|           | Propranolol-HCl            | GHQ168 | GHQ242 | GHQ243 | Fluorescein |
| MV [cm/s] | 14.47                      | 7.09   | 9.77   | 8.52   | 1.27        |
| SD [cm/s] | 2.28                       | 4.90   | 3.80   | 2.51   | 0.02        |
| RSD [%]   | 15.75                      | 69.09  | 38.96  | 29.48  | 1.70        |

**TABLE S2** Results for permeability testing in Caco-2 cells.

Calculation of  $P_{app}$ :

$$P_{app} = \frac{V_A}{Area \times Time} \times \frac{[drug]_{acceptor}}{[drug]_{initial,donor}}$$

$V_A = 0.6$ , Area = 0.33, Time = 3600 s,  $[drug]_{initial,donor} = 100$

## **In vitro activity and Cytotoxicity**

### ***In vitro* activity**

The anti-trypanosomal activity was recorded essentially as developed by Rüz *et al.* (with some modifications, cf. Ilkay 2010). The compounds were dissolved in DMSO (20 mM).

In brief, *T.b. brucei* TC 221 were incubated at a cell density of  $1 \times 10^5$  cells/mL in Complete Baltz medium (Baltz, 1985) with serial dilutions of the compounds at 37 °C and 5 % CO<sub>2</sub> for 72 h. The final DMSO concentration was 1 %. After 24 h of incubation, AlamarBlue was added to a final concentration of 1.1 mg/L and the plates were incubated further on for 48 h. Untreated cells and cells incubated with the solvent only were used as controls to check for parasite viability. The IC<sub>50</sub> value was calculated with respect to negative controls (without compounds) from the absorbance values measured at  $\lambda=550\text{nm}$  using a microplate reader (Asys Expert 96, Biochrome, Cambridge, UK). Reference wavelength was set to  $\lambda=630\text{nm}$ .

*T. brucei rhodesiense* STIB 900 BSF trypomastigotes were seeded at  $1 \times 10^3$  cells/mL in 200 $\mu\text{L}$  of growth medium (composition: Minimum Essential Medium 50  $\mu\text{L}$ , 25 mM HEPES, 1g/L additional glucose, 1% MEM non-essential amino acids (100x), 0.2 mM 2-mercaptoethanol, 1 mM sodium pyruvate and 15% heat inactivated horse serum) with serial dilutions of the compounds. After incubation for 3 days at 37°C and 5% CO<sub>2</sub>, 20 $\mu\text{L}$  of AlamarBlue (12.5mg/100mL) were added to each well and the plates were incubated for further 16h.

After reading the plates using an excitation wavelength of 536nm and an emission wavelength of 588nm (Multiskan Ascent, Thermo Fisher Scientific, Braunschweig, Germany), data were analysed and the IC<sub>50</sub> value was calculated.

### **References:**

1. **Rüz B, Iten M, Grether-Bühler Y, Kaminsky R, Brun R.** 1997. The Alamar Blue® assay to determine drug sensitivity of African trypanosomes (*T.b. rhodesiense* and *T.b. gambiense*) in vitro. *Acta Tropica* **68**:139-147.
2. **Baltz T, Baltz D, Giroud C, Crockett J.** 1985. Cultivation in a semi-defined medium of animal infective forms of *Trypanosoma brucei*, *T. equiperdum*, *T. evansi*, *T. rhodesiense* and *T. gambiense*. *EMBO J* **4**:1273-1277.
3. **Papadopoulou MV, Bloomer WD, Lepesheva GI, Rosenzweig HS, Kaiser M, Aguilera-Venegas B, Wilkins**
4. **on SR, Chatelain E, Ioset J-R.** 2015. Novel 3-nitrotriazole-based amides and carbinols as bifunctional antichagasic agents. *Journal of medicinal chemistry* **58**:1307-1319.

## **Cytotoxicity.**

Cell viability was measured as described before (Larson 1997, Muth 2007). Briefly, the compounds were dissolved in DMSO to a concentration of 20 mM and serially diluted in DMSO. A defined number of mammalian cells (see below) were incubated in a volume of 200  $\mu$ l in 96-well cell culture plates in the respective medium without phenol red with serial compound dilutions at 37 °C and 5 % CO<sub>2</sub>. The final concentration of DMSO was 1 %. After 24 h of incubation, 10 % of an AlamarBlue solution was added. The CC<sub>50</sub> value was calculated with respect to negative controls (without compounds) from the absorbance values measured at  $\lambda$ =550 nm using a microplate reader (Multiskan Ascent, Thermo Fisher Scientific, Braunschweig, Germany). The reference wavelength was set to  $\lambda$ =630 nm.

## **References:**

1. **Larson EM, Doughman DJ, Gregerson DS, Obritsch WF.** 1997. A new, simple, nonradioactive, nontoxic in vitro assay to monitor corneal endothelial cell viability. *Investigative Ophthalmology & Visual Science* **38**:1929-1933
2. **Muth M, Hoerr V, Glaser M, Ponte-Sucre A, Moll H, Stich A, Holzgrabe U.** 2007. Antitrypanosomal activity of quaternary naphthalimide derivatives. *Bioorganic & medicinal chemistry letters* **17**:1590-1593.

#### 4. PBPK modelling

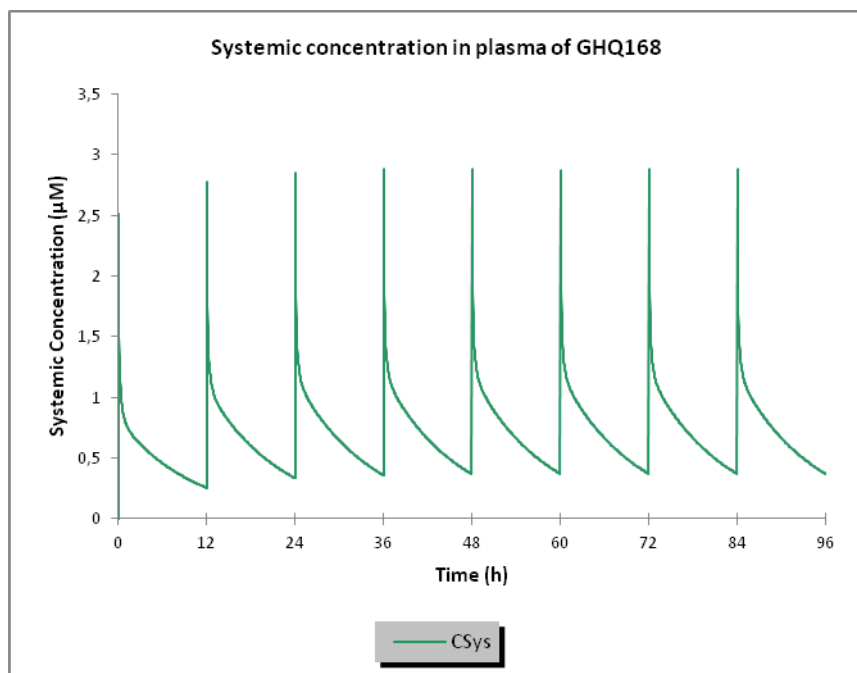

FIG S5A Simcyp plasma concentration prediction for GHQ168

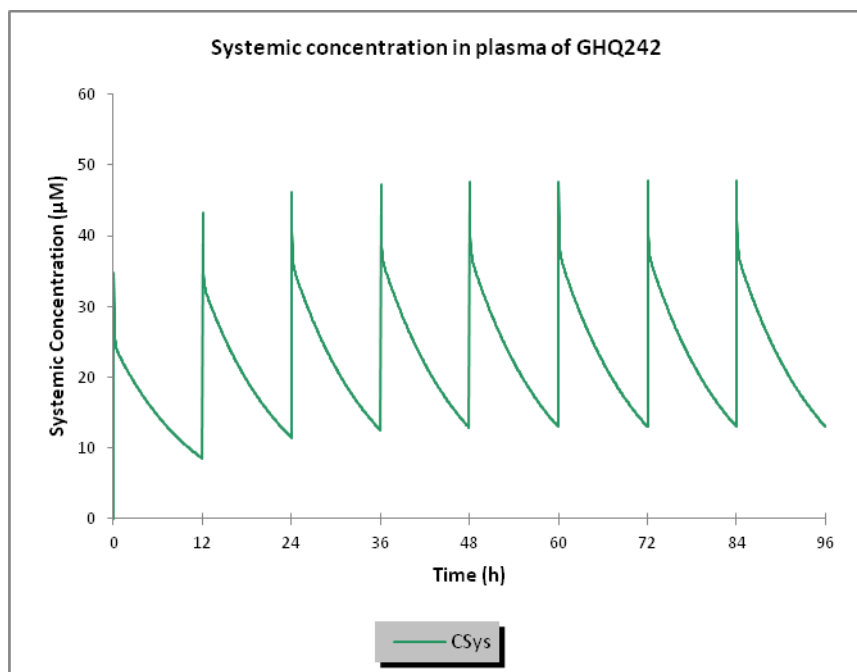

FIG S5B: Simcyp plasma concentration prediction for GHQ242

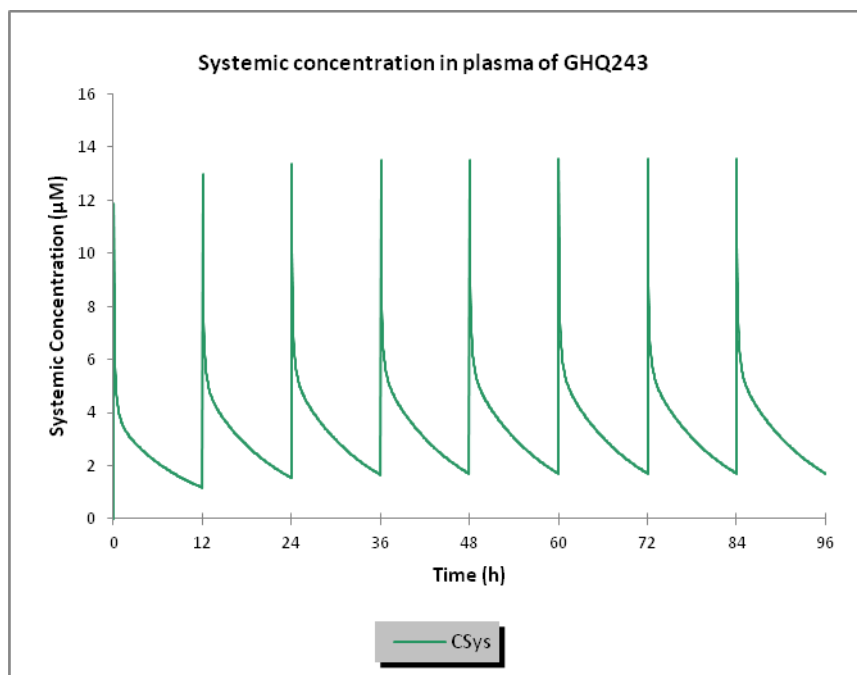

**FIG S5C** Simcyp plasma concentration prediction for GHQ243

## 5. Pharmacokinetics

### Analytical Method Validation

*GHQ168*:

| Sample Name                      | Concentration [ng/ml] | Peak Area GHQ168   | Peak Area Int. standard | Ratio of Peak Areas       | Weighting (1/c <sup>2</sup> ) | Conc. calc. [ng/ml]                  | RD [%] |
|----------------------------------|-----------------------|--------------------|-------------------------|---------------------------|-------------------------------|--------------------------------------|--------|
| E08                              | 500.000               | 1990000            | 23400000                | 0.0850427                 | 4.00E-06                      | 495.08                               | -1.0   |
| E07                              | 400.000               | 1720000            | 24600000                | 0.0699187                 | 6.25E-06                      | 407.05                               | 1.8    |
| E06                              | 200.000               | 829000             | 23000000                | 0.0360435                 | 2.50E-05                      | 209.87                               | 4.9    |
| E05                              | 100.000               | 398000             | 22300000                | 0.0178475                 | 1.00E-04                      | 103.96                               | 4.0    |
| E04                              | 20.000                | 79200              | 22500000                | 0.0035200                 | 2.50E-03                      | 20.56                                | 2.8    |
| E03                              | 5.000                 | 16300              | 22400000                | 0.0007277                 | 4.00E-02                      | 4.31                                 | -13.8  |
| E02                              | 2.000                 | 6820               | 21100000                | 0.0003232                 | 2.50E-01                      | 1.96                                 | -2.0   |
| E01                              | 1.000                 | 3590               | 21700000                | 0.0001654                 | 1.00E+00                      | 1.04                                 | 4.0    |
| <b>Standard curve parameters</b> |                       | Slope<br>0.0001718 |                         | Intercept<br>-0.000012760 |                               | Coefficient of Correlation<br>0.9977 |        |

**TABLE S3A** Linearity data for GHQ168 in the concentration range of 1.0 - 500.0 ng/ml

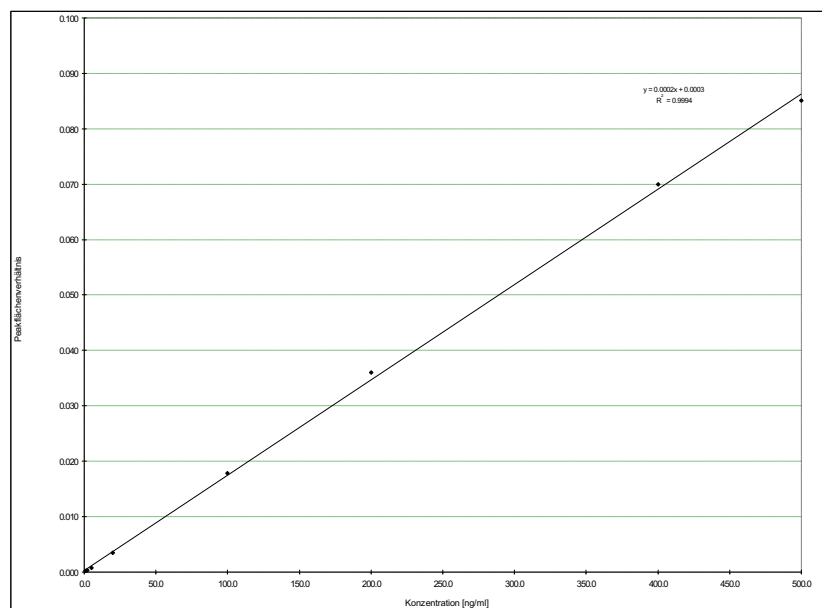

**FIG S6A** Linearity curve of GHQ168 in the concentration range of 1.0 - 500.0 ng/ml

| Sample Name                             | High conc.<br>[ng/ml] | Peak Area<br>GHQ168 | Peak Area<br>Int. standard | Ratio of<br>Peak Areas     | Conc. calc.<br>[ng/ml]           | RD<br>[%] |
|-----------------------------------------|-----------------------|---------------------|----------------------------|----------------------------|----------------------------------|-----------|
| QC-H1                                   | 400.000               | 1620000             | 23100000                   | 0.07013                    | 408.281                          | 2.1       |
| QC-H2                                   | 400.000               | 1640000             | 24000000                   | 0.06833                    | 397.804                          | -0.5      |
| QC-H3                                   | 400.000               | 1650000             | 23200000                   | 0.07112                    | 414.044                          | 3.5       |
| QC-H4                                   | 400.000               | 1730000             | 23300000                   | 0.07425                    | 432.263                          | 8.1       |
| QC-H5                                   | 400.000               | 1730000             | 22600000                   | 0.07655                    | 445.651                          | 11.4      |
| QC-H6                                   | 400.000               | 1690000             | 25200000                   | 0.06706                    | 390.412                          | -2.4      |
| arithm. mean<br>±SD<br>CV [%]<br>RD [%] |                       |                     |                            | 0.07124<br>0.003590<br>5.0 | 414.743<br>20.8970<br>5.0<br>3.7 |           |

| Sample Name                             | Medium conc.<br>[ng/ml] | Peak Area<br>GHQ168 | Peak Area<br>Int. standard | Ratio of<br>Peak Areas     | Conc. calc.<br>[ng/ml]          | RD<br>[%] |
|-----------------------------------------|-------------------------|---------------------|----------------------------|----------------------------|---------------------------------|-----------|
| QC-M1                                   | 100.000                 | 402000              | 24000000                   | 0.01675                    | 97.571                          | -2.4      |
| QC-M2                                   | 100.000                 | 368000              | 24000000                   | 0.01533                    | 89.306                          | -10.7     |
| QC-M3                                   | 100.000                 | 374000              | 21600000                   | 0.01731                    | 100.831                         | 0.8       |
| QC-M4                                   | 100.000                 | 393000              | 23000000                   | 0.01709                    | 99.550                          | -0.5      |
| QC-M5                                   | 100.000                 | 361000              | 21000000                   | 0.01719                    | 100.132                         | 0.1       |
| QC-M6                                   | 100.000                 | 362000              | 21200000                   | 0.01708                    | 99.492                          | -0.5      |
| arithm. mean<br>±SD<br>CV [%]<br>RD [%] |                         |                     |                            | 0.01679<br>0.000740<br>4.4 | 97.814<br>4.3070<br>4.4<br>-2.2 |           |

| Sample Name                             | Low conc.<br>[ng/ml] | Peak Area<br>GHQ168 | Peak Area<br>Int. standard | Ratio of<br>Peak Areas     | Conc. calc.<br>[ng/ml]         | RD<br>[%] |
|-----------------------------------------|----------------------|---------------------|----------------------------|----------------------------|--------------------------------|-----------|
| QC-L1                                   | 5.000                | 15800               | 21400000                   | 0.00074                    | 4.382                          | -12.4     |
| QC-L2                                   | 5.000                | 16600               | 21200000                   | 0.00078                    | 4.614                          | -7.7      |
| QC-L3                                   | 5.000                | 16700               | 20500000                   | 0.00081                    | 4.789                          | -4.2      |
| QC-L4                                   | 5.000                | 15900               | 21000000                   | 0.00076                    | 4.498                          | -10.0     |
| QC-L5                                   | 5.000                | 15700               | 20000000                   | 0.00079                    | 4.673                          | -6.5      |
| QC-L6                                   | 5.000                | 17100               | 21100000                   | 0.00081                    | 4.789                          | -4.2      |
| arithm. mean<br>±SD<br>CV [%]<br>RD [%] |                      |                     |                            | 0.00078<br>0.000028<br>3.6 | 4.624<br>0.1621<br>3.5<br>-7.5 |           |

**TABLE S3B** Precision data for GHQ168 at high, medium and low concentrations

*GHQ242:*

| Sample Name                      | Concentration [ng/ml] | Peak Area GHQ168   | Peak Area Int. standard | Ratio of Peak Areas       | Weighting (1/c <sup>2</sup> ) | Conc. calc. [ng/ml]                  | RD [%] |
|----------------------------------|-----------------------|--------------------|-------------------------|---------------------------|-------------------------------|--------------------------------------|--------|
| E08                              | 500.000               | 1320000            | 21500000                | 0.0613953                 | 4.00E-06                      | 527.61                               | 5.5    |
| E07                              | 400.000               | 993000             | 21400000                | 0.0464019                 | 6.25E-06                      | 398.80                               | -0.3   |
| E06                              | 200.000               | 491000             | 20500000                | 0.0239512                 | 2.50E-05                      | 205.92                               | 3.0    |
| E05                              | 100.000               | 242000             | 21400000                | 0.0113084                 | 1.00E-04                      | 97.31                                | -2.7   |
| E04                              | 20.000                | 43700              | 20100000                | 0.0021741                 | 2.50E-03                      | 18.83                                | -5.9   |
| E03                              | 5.000                 | 10700              | 19400000                | 0.0005515                 | 4.00E-02                      | 4.89                                 | -2.2   |
| E02                              | 2.000                 | 4660               | 20900000                | 0.0002230                 | 2.50E-01                      | 2.07                                 | 3.5    |
| E01                              | 1.000                 | 2040               | 21000000                | 0.0000971                 | 1.00E+00                      | 0.99                                 | -1.0   |
| <b>Standard curve parameters</b> |                       | Slope<br>0.0001164 |                         | Intercept<br>-0.000018075 |                               | Coefficient of Correlation<br>0.9991 |        |

**TABLE S3C** Linearity data for GHQ242 in the concentration range of 1.0 - 500.0 ng/ml

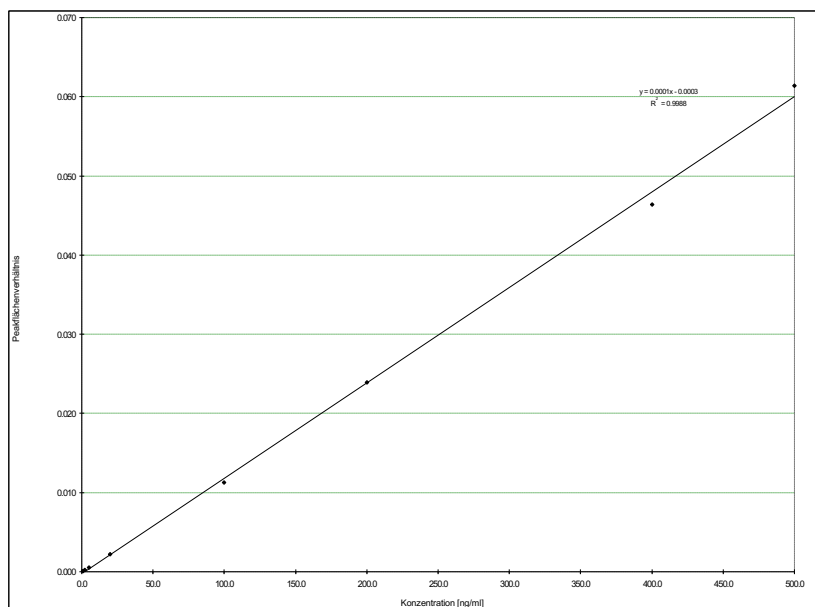

**FIG S6B** Linearity curve of GHQ242 in the concentration range of 1.0 - 500.0 ng/ml



| Sample Name  | High conc.<br>[ng/ml] | Peak Area<br>GHQ168 | Peak Area<br>Int. standard | Ratio of<br>Peak Areas | Conc. calc.<br>[ng/ml] | RD<br>[%] |
|--------------|-----------------------|---------------------|----------------------------|------------------------|------------------------|-----------|
| QC-H1        | 400.000               | 976000              | 20700000                   | 0.04715                | 405.224                | 1.3       |
| QC-H2        | 400.000               | 1020000             | 21900000                   | 0.04658                | 400.327                | 0.1       |
| QC-H3        | 400.000               | 985000              | 20700000                   | 0.04758                | 408.918                | 2.2       |
| QC-H4        | 400.000               | 978000              | 20000000                   | 0.04890                | 420.258                | 5.1       |
| QC-H5        | 400.000               | 1030000             | 21700000                   | 0.04747                | 407.973                | 2.0       |
| QC-H6        | 400.000               | 966000              | 20600000                   | 0.04689                | 402.990                | 0.7       |
| arithm. mean |                       |                     |                            | 0.04743                | 407.615                |           |
| ±SD          |                       |                     |                            | 0.000810               | 6.9555                 |           |
| CV [%]       |                       |                     |                            | 1.7                    | 1.7                    |           |
| RD [%]       |                       |                     |                            |                        | 1.9                    |           |

| Sample Name  | Medium conc.<br>[ng/ml] | Peak Area<br>GHQ168 | Peak Area<br>Int. standard | Ratio of<br>Peak Areas | Conc. calc.<br>[ng/ml] | RD<br>[%] |
|--------------|-------------------------|---------------------|----------------------------|------------------------|------------------------|-----------|
| QC-M1        | 100.000                 | 230000              | 19700000                   | 0.01168                | 100.499                | 0.5       |
| QC-M2        | 100.000                 | 231000              | 19200000                   | 0.01203                | 103.506                | 3.5       |
| QC-M3        | 100.000                 | 232000              | 20500000                   | 0.01132                | 97.406                 | -2.6      |
| QC-M4        | 100.000                 | 238000              | 21000000                   | 0.01133                | 97.492                 | -2.5      |
| QC-M5        | 100.000                 | 249000              | 21400000                   | 0.01164                | 100.155                | 0.2       |
| QC-M6        | 100.000                 | 238000              | 20500000                   | 0.01161                | 99.898                 | -0.1      |
| arithm. mean |                         |                     |                            | 0.01160                | 99.826                 |           |
| ±SD          |                         |                     |                            | 0.000262               | 2.2544                 |           |
| CV [%]       |                         |                     |                            | 2.3                    | 2.3                    |           |
| RD [%]       |                         |                     |                            |                        | -0.2                   |           |

| Sample Name  | Low conc.<br>[ng/ml] | Peak Area<br>GHQ168 | Peak Area<br>Int. standard | Ratio of<br>Peak Areas | Conc. calc.<br>[ng/ml] | RD<br>[%] |
|--------------|----------------------|---------------------|----------------------------|------------------------|------------------------|-----------|
| QC-L1        | 5.000                | 11000               | 19800000                   | 0.00056                | 4.966                  | -0.7      |
| QC-L2        | 5.000                | 11200               | 21000000                   | 0.00053                | 4.709                  | -5.8      |
| QC-L3        | 5.000                | 11300               | 19900000                   | 0.00057                | 5.052                  | 1.0       |
| QC-L4        | 5.000                | 11000               | 20000000                   | 0.00055                | 4.880                  | -2.4      |
| QC-L5        | 5.000                | 10600               | 20500000                   | 0.00052                | 4.623                  | -7.5      |
| QC-L6        | 5.000                | 10700               | 20400000                   | 0.00052                | 4.623                  | -7.5      |
| arithm. mean |                      |                     |                            | 0.00054                | 4.809                  |           |
| ±SD          |                      |                     |                            | 0.000021               | 0.1833                 |           |
| CV [%]       |                      |                     |                            | 3.9                    | 3.8                    |           |
| RD [%]       |                      |                     |                            |                        | -3.8                   |           |

**TABLE S3D** Precision data for GHQ242 at high, medium and low concentrations

GHQ243:

| Sample Name                      | Concentration [ng/ml] | Peak Area GHQ168   | Peak Area Int. standard | Ratio of Peak Areas       | Weighting (1/c <sup>2</sup> ) | Conc. calc. [ng/ml]                  | RD [%] |
|----------------------------------|-----------------------|--------------------|-------------------------|---------------------------|-------------------------------|--------------------------------------|--------|
| E08                              | 500.000               | 516000             | 21400000                | 0.0241121                 | 4.00E-06                      | 519.76                               | 4.0    |
| E07                              | 400.000               | 404000             | 20900000                | 0.0193301                 | 6.25E-06                      | 416.70                               | 4.2    |
| E06                              | 200.000               | 189000             | 20700000                | 0.0091304                 | 2.50E-05                      | 196.88                               | -1.6   |
| E05                              | 100.000               | 98600              | 20900000                | 0.0047177                 | 1.00E-04                      | 101.78                               | 1.8    |
| E04                              | 20.000                | 18300              | 20300000                | 0.0009015                 | 2.50E-03                      | 19.53                                | -2.3   |
| E03                              | 5.000                 | 4570               | 21200000                | 0.0002156                 | 4.00E-02                      | 4.75                                 | -5.0   |
| E02                              | 2.000                 | 1830               | 21800000                | 0.0000839                 | 2.50E-01                      | 1.91                                 | -4.5   |
| E01                              | 1.000                 | 895                | 20700000                | 0.0000432                 | 1.00E+00                      | 1.03                                 | 3.0    |
| <b>Standard curve parameters</b> |                       | Slope<br>0.0000464 |                         | Intercept<br>-0.000004727 |                               | Coefficient of Correlation<br>0.9991 |        |

**TABLE S3E** Linearity data for GHQ243 in the concentration range of 1.0 - 500.0 ng/ml

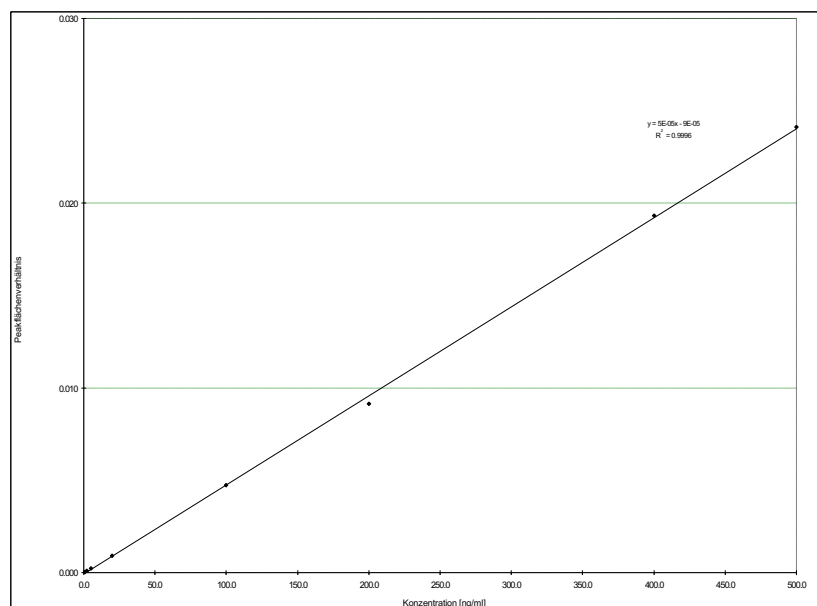

**FIG S6C** Linearity curve of GHQ243 in the concentration range of 1.0 - 500.0 ng/ml

| Sample Name                             | High conc.<br>[ng/ml] | Peak Area<br>GHQ168 | Peak Area<br>Int. standard | Ratio of<br>Peak Areas     | Conc. calc.<br>[ng/ml]    | RD<br>[%] |
|-----------------------------------------|-----------------------|---------------------|----------------------------|----------------------------|---------------------------|-----------|
| QC-H1                                   | 400.000               | 402000              | 21000000                   | 0.01914                    | 412.602                   | 3.2       |
| QC-H2                                   | 400.000               | 401000              | 19600000                   | 0.02046                    | 441.050                   | 10.3      |
| QC-H3                                   | 400.000               | 387000              | 20500000                   | 0.01888                    | 406.998                   | 1.7       |
| QC-H4                                   | 400.000               | 405000              | 20900000                   | 0.01938                    | 417.774                   | 4.4       |
| QC-H5                                   | 400.000               | 411000              | 20600000                   | 0.01995                    | 430.059                   | 7.5       |
| arithm. mean<br>±SD<br>CV [%]<br>RD [%] |                       |                     |                            | 0.01956<br>0.000639<br>3.3 | 421.697<br>13.7716<br>3.3 | 5.4       |

| Sample Name                             | Medium conc.<br>[ng/ml] | Peak Area<br>GHQ168 | Peak Area<br>Int. standard | Ratio of<br>Peak Areas     | Conc. calc.<br>[ng/ml]   | RD<br>[%] |
|-----------------------------------------|-------------------------|---------------------|----------------------------|----------------------------|--------------------------|-----------|
| QC-M1                                   | 100.000                 | 102000              | 21400000                   | 0.00477                    | 102.904                  | 2.9       |
| QC-M2                                   | 100.000                 | 97900               | 20600000                   | 0.00475                    | 102.473                  | 2.5       |
| QC-M3                                   | 100.000                 | 99800               | 19800000                   | 0.00504                    | 108.723                  | 8.7       |
| QC-M4                                   | 100.000                 | 98200               | 20200000                   | 0.00486                    | 104.843                  | 4.8       |
| QC-M5                                   | 100.000                 | 96700               | 20700000                   | 0.00467                    | 100.748                  | 0.7       |
| QC-M6                                   | 100.000                 | 98200               | 20600000                   | 0.00477                    | 102.904                  | 2.9       |
| arithm. mean<br>±SD<br>CV [%]<br>RD [%] |                         |                     |                            | 0.00481<br>0.000128<br>2.7 | 103.766<br>2.7567<br>2.7 | 3.8       |

| Sample Name                             | Low conc.<br>[ng/ml] | Peak Area<br>GHQ168 | Peak Area<br>Int. standard | Ratio of<br>Peak Areas     | Conc. calc.<br>[ng/ml] | RD<br>[%] |
|-----------------------------------------|----------------------|---------------------|----------------------------|----------------------------|------------------------|-----------|
| QC-L1                                   | 5.000                | 4650                | 20000000                   | 0.00023                    | 5.059                  | 1.2       |
| QC-L2                                   | 5.000                | 4610                | 21600000                   | 0.00021                    | 4.628                  | -7.4      |
| QC-L3                                   | 5.000                | 4290                | 21000000                   | 0.00020                    | 4.412                  | -11.8     |
| QC-L4                                   | 5.000                | 4420                | 21100000                   | 0.00021                    | 4.628                  | -7.4      |
| QC-L5                                   | 5.000                | 4790                | 21900000                   | 0.00022                    | 4.843                  | -3.1      |
| QC-L6                                   | 5.000                | 5110                | 21400000                   | 0.00024                    | 5.274                  | 5.5       |
| arithm. mean<br>±SD<br>CV [%]<br>RD [%] |                      |                     |                            | 0.00022<br>0.000015<br>6.8 | 4.807<br>0.3172<br>6.6 | -3.9      |

**TABLE S3F** Precision data for GHQ168 at high, medium and low concentrations

### Blood concentration levels

| Compound | Animal | Time [h] | Conc. [ng/ml] | Conc. [ $\mu$ M] |
|----------|--------|----------|---------------|------------------|
| GHQ168   | 1      | 1        | 293.0         | 0.669714         |
|          | 2      |          | 195.9         | 0.447771         |
|          | 3      |          | 46.2          | 0.105600         |
|          | 1      | 4        | 17.6          | 0.040229         |
|          | 2      |          | 27.1          | 0.061943         |
|          | 3      |          | 75.7          | 0.173029         |
|          | 1      | 16       | 0.3           | 0.000686         |
|          | 2      |          | 1.7           | 0.003886         |
|          | 3      |          | 1.0           | 0.002286         |
| GHQ242   | 1      | 1        | 11.7          | 0.022137         |
|          | 2      |          | 17.4          | 0.032921         |
|          | 3      |          | 3.2           | 0.006055         |
|          | 4      |          | 49.8          | 0.094224         |
|          | 1      | 4        | 2.9           | 0.005487         |
|          | 2      |          | 8.4           | 0.015893         |
|          | 3      |          | 5.5           | 0.010406         |
|          | 4      |          | 10.1          | 0.019110         |
|          | 1      | 16       | 14.6          | 0.027624         |
|          | 2      |          | 1.0           | 0.001892         |
|          | 3      |          | 2.2           | 0.004162         |
|          | 4      |          | < 1.0         | 0.000946         |
| GHQ243   | 1      | 1        | 376.1         | 0.693195         |
|          | 2      |          | 191.1         | 0.352219         |
|          | 3      |          | 223.0         | 0.411014         |
|          | 4      |          | 202.6         | 0.373415         |
|          | 1      | 4        | 41.8          | 0.077042         |
|          | 2      |          | 14.3          | 0.026357         |
|          | 3      |          | 22.8          | 0.042023         |
|          | 4      |          | 13.2          | 0.024329         |
|          | 1      | 16       | 4.0           | 0.007372         |
|          | 2      |          | 5.5           | 0.010137         |
|          | 3      |          | 2.0           | 0.003686         |
|          | 4      |          | < 1.0         | 0.000922         |

**TABLE S4:** Blood concentration levels of GHQ168, GHQ242 and GHQ243 in mice.

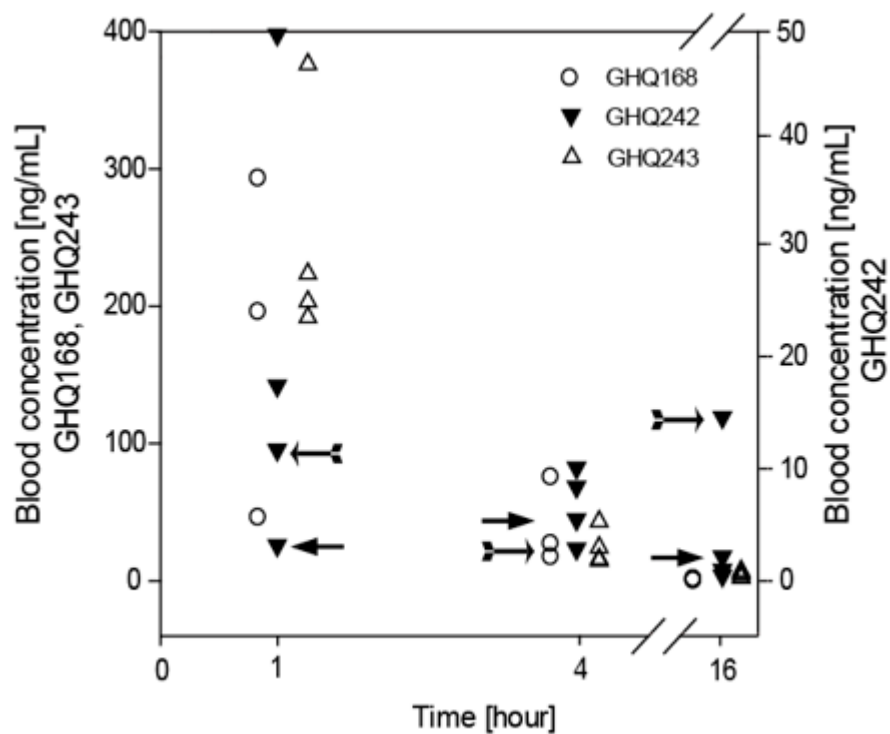

**FIGURE S7:** Blood concentration [ng/mL] versus time profiles [hour]. Arrows highlight two individual mice exposed to GHQ242 for which concentration results from subsequent samplings exceeded those of previous samples. The left axis is for GHQ168, and GHQ 243, the right axis for GHQ242.
